1 **Mating system of *Ustilago esculenta* and its polymorphism**

2 Syun-Wun Liang<sup>\*†</sup>

3 Yen-Hua Huang<sup>†</sup>

4 Jian-Ying Chiu<sup>†</sup>

5 Hsin-Wan Tseng<sup>\*</sup>

6 Jin-Hsing Haung<sup>‡</sup>

7 Wei-Chiang Shen<sup>\*1</sup>

8

9 <sup>\*</sup>Department of Plant Pathology and Microbiology, National Taiwan University,

10 Taipei 10617, Taiwan, ROC

11 <sup>†</sup>Institute of Biomedical Informatics and Center for Systems and Synthetic Biology,

12 National Yang-Ming University, Taipei 11221, Taiwan, ROC

13 <sup>‡</sup>Plant Pathology Division, Taiwan Agricultural Research Institute, Taichung 41362,

14 Taiwan, ROC

15

16 <sup>1</sup>Corresponding author:

17 Wei-Chiang Shen

18 Department of Plant Pathology and Microbiology

19 National Taiwan University

20 No. 1, Sec. 4, Roosevelt Rd., Taipei 10617, Taiwan, ROC

21 E-mail: wshen@ntu.edu.tw

22

23

24 Running title: *U. esculenta* is bipolar and multiallelic

25

26

27 **ABSTRACT**

28 *Zizania latifolia* Turcz., which is mainly distributed in Asia, has had a long  
29 cultivation history as a cereal and vegetable crop. On infection with the smut fungus  
30 *Ustilago esculenta*, *Z. latifolia* becomes an edible vegetable, water bamboo. Two  
31 main cultivars, with a green shell and red shell, are cultivated for commercial  
32 production in Taiwan. Previous studies indicated that cultivars of *Z. latifolia* may be  
33 related to infection with *U. esculenta* isolates. However, related research is limited.  
34 The infection process of the corn smut fungus *Ustilago maydis* is coupled with sexual  
35 development and under control of the mating type locus. Thus, we aimed to use  
36 knowledge of *U. maydis* to reveal the mating system of *U. esculenta*. We collected  
37 water bamboo and isolated 145 *U. esculenta* strains from Taiwan's major production  
38 areas. By using PCR and idiomorph screening among meiotic offspring and field  
39 isolates, we identified three idiomorphs of the mating type locus and found no  
40 sequence recombination between them. Whole-genome sequencing (Illumina and  
41 Pacbio) suggested that the mating system of *U. esculenta* was bipolar. Mating type  
42 locus 1 (*MAT-1*) was 555,862 bp, and contained 44% repeated sequences. Sequence  
43 comparison revealed that *U. esculenta* *MAT-1* shared better conservation with the sex  
44 chromosome of *U. maydis* than *U. hordei*. These results can be utilized to further  
45 explore the genomic diversity of *U. esculenta* isolates and their application for water  
46 bamboo breeding.

47

48 **Keywords:** *U. esculenta*, smut fungus, *Zizania latifolia*, water bamboo, bipolar  
49 heterothallism, mating type locus

50

51

## 52 INTRODUCTION

53 Water bamboo is one of the most popular vegetables in Asia. When the wild  
54 rice *Zizania latifolia* Turcz. is infected by the smut fungus *Ustilago esculenta*,  
55 tumor-like tissue is produced in the basal stem of plants. This gall tumor is known as  
56 “water bamboo”, ‘Kal-peh-soon’ or ‘Jiaobai’. The red shell water bamboo cultivar, a  
57 single-season plant, and green shell cultivar, a multi-season plant, are two main  
58 cultivars in Taiwan. However, with LED technology, the green shell cultivar is now  
59 harvested year-round. The major difference in the two cultivars is that the red shell  
60 cultivar grows with red spots on the inner layer of the leaf sheath and the other lacks  
61 these spots.

62 The cultivar variation is caused by the different characteristics of *U. esculenta*  
63 strains (Hung *et al.* 2001). Because *U. esculenta* invades host plants, its hyphae can be  
64 observed in the rhizome and basal stem of its host plant, including nodes, buds and  
65 shoots, which have been explored thoroughly by fluorescence microscopy (Jose *et al.*  
66 2016). Meanwhile, auxin and cytokinin are accumulated after *U. esculenta* infection,  
67 followed by the induction of galls on the host plant.

68 The concentration of auxin shows a gradient variation in different stages of gall  
69 tumor (Chan and Thrower 1980; Chung and Tzeng 2004; Wang *et al.* 2017). During  
70 hyphae invasion, both intercellular and intracellular processes exist. With intercellular  
71 invasion, hyphae penetrate the plant cell and digest its interior contents. Several  
72 hyphae then gather in this space, followed by the production of teliospores from the  
73 ends of the hyphae (Zhang *et al.* 2012).

74 *U. esculenta* is a smut fungi belonging to the Basidiomycota. It has several  
75 common characteristics with other smut fungi, such as dimorphism of cell  
76 morphology, production of powder-like teliospores and invading the host plant as a  
77 sexual hypha (Martinez-Espinoza 1993; Kües *et al.* 2011; Ye *et al.* 2017). On the

78 basis of the origin of gall characteristics, *U. esculenta* strains are designated as  
79 teliospore (T) and mycelia-teliospore (M-T) strains. ‘Baishin’, ‘Huashin’ and ‘Heishin’  
80 are three types of galls found in Taiwan. Heishin usually produces the T strain,  
81 producing abundant teliospore sori in the early gall formation stage, whereas Huashin  
82 or Baishin produces the M-T strain, with few or no teliospores produced in the later  
83 gall formation stage (Yang and Leu 1978; Zhang *et al.* 2017). Baishin has high  
84 economical value as compared with Huashin. However, Heishin is discarded once  
85 found in the field. Therefore, *U. esculenta* is forced to maintain in the mycelial state  
86 and fails to complete sexual reproduction inside the vegetatively propagated crop host.  
87 *U. esculenta* lacks several essential virulence factors and has had relatively slow  
88 evolution under many years of artificial selection (Ye *et al.* 2017). The genome of the  
89 diploid mycelium in *U. esculenta* was sequenced and analyzed.

90 The mating system in several fungi has been linked to the infection; examples  
91 are *Ustilago maydis* (Bakkeren *et al.* 2008) and *Cryptococcus neoformans* (Nielsen  
92 and Heitman 2007). In the broad study of fungus, the determinant genes are conserved  
93 and have been reviewed: mating factor (*mfa*), pheromone receptor (*pra*), and  
94 heterodimeric homeodomain transcription factors (HD1 and HD2) (*bE* and *bW* genes  
95 in *U. maydis*) (Brefort *et al.* 2009). When two opposite mating-type cells meet, one  
96 pheromone is recognized by another pheromone receptor. *Mfa* encodes a precursor  
97 pheromone peptide, which is sensed and received by a pheromone receptor. The Pra  
98 protein then triggers the MAPK module and Prf1 protein to activate the expression of  
99 the bE/bW heterodimer complex (encoded by *bE* and *bW* genes). The subsequent  
100 pathogenic progress begins, including development of the conjugation tube and  
101 penetration. (Anderson *et al.* 1999; Brefort *et al.* 2009; Kües *et al.* 2011)

102 Sexual behavior in the fungi is known as homothallism or heterothallism.  
103 Heterothallism is further classified as bipolar and tetrapolar based on the absence of

104 genetic linkage of a and b gene regions. A gene region mainly includes *pra* and *mfa*  
105 genes, whereas b gene region contains *bE* and *bW* genes. Several smut fungi  
106 identified by mating type include *U. maydis* (2 a and 25 b gene complex) and  
107 *Sporisorium reilianum* (3 a and 5 b gene complex), which are tetrapolar, and *Ustilago*  
108 *hordei*, which is bipolar (Stakman and Christensen 1927; Schirawski *et al.* 2005; Kües  
109 *et al.* 2011). *U. hordei* carries the largest mating-type loci in smut fungi: *MAT-1* and  
110 *MAT-2*, which are 500 and 430 kb, respectively (Bakkeren and Kronstad 1994; Lee *et*  
111 *al.* 1999). As well, 50% of long terminal repeats and transposable elements appear on  
112 *MAT-1* (Horns *et al.* 2012).

113 The origin of the mating system is controversial. Genome comparison of these  
114 regions inferred that *U. maydis* and *U. hordei* both evolved from *S. reilianum*, so the  
115 evolution of the mating system was from tetrapolar to bipolar (Bakkeren *et al.* 2006;  
116 Laurie *et al.* 2012). The *U. esculenta* mating system is considered tetrapolar (Yang  
117 and Leu 1978) and carries three gene complexes and three b gene complexes (Ye *et al.*  
118 2017). However, we lack solid evidence for this.

119 Every year, farmers face huge production loss because of the formation of  
120 teliospores in water bamboo for unknown reasons. Without understanding the process  
121 of infection, solving this problem is difficult. This study examined the mating type  
122 locus of *U. esculenta* and three other smut fungi. To further understand the *U.*  
123 *esculenta* mating process and its possible application for reducing agricultural  
124 production loss, we aimed to reveal the complete mating type locus of *U. esculenta*  
125 and its system.

126

## 127 **MATERIALS AND METHODS**

### 128 **Isolation and preservation of *U. esculenta***

129 Two main cultivars, green shell and red shell, of *Zizania latifolia*-infected samples  
130 were collected from the commercial fields and an agricultural research institute in  
131 Taiwan. The red shell cultivar is mainly distributed in northern Taiwan, and the green  
132 shell cultivar is predominantly cultivated in central Taiwan. *U. esculenta* was isolated  
133 from the galls of infected plants by micromanipulation or tissue isolation.  
134 Micromanipulation was used to isolate strains from galls with teliospore sori. In brief,  
135 teliospores were collected from infected tissues and suspended in sterile water. Spores  
136 were spread onto potato dextrose agar (PDA) containing 50 µg/ml chloramphenicol to  
137 induce germination at 28°. About 18 to 20 hr post-incubation, haploid meiotic  
138 progeny were picked by micromanipulator (ECLIPSE 50i, Nikon) when most  
139 promycelia contained four sporidia. Tissue isolation was used to isolate strains from  
140 galls lacking black sori. Leaf sheaths were first removed and intact galls were  
141 collected and cut open under laminar flow. Ten pieces of internal tissue were  
142 aseptically excised, placed on PDA medium containing 50 µg/ml chloramphenicol,  
143 and incubated at 28° for 1 to 2 weeks. Sporidial colony produced from the sections  
144 were then re-suspended, diluted and spread on PDA medium. Finally, haploid  
145 sporidial strain was obtained from a single colony. Strains were preserved by  
146 culturing strains at 28° in potato dextrose broth (PDB) plus 1% sorbose for 72 hr.  
147 Culture was then mixed with an equal volume of cryoprotective liquid (20% glycerol,  
148 10% lactose), kept at -20° for 30 min and then stored at -80°.

#### 149 **Nuclear and septal staining**

150 Nuclear and septal staining were performed by using 4', 6-diamidino-2-phenylindole  
151 (DAPI; Sigma) and calcofluor white (CFW; fluorescent brightener 28, Sigma). *U.*  
152 *esculenta* cells were first fixed in fixation buffer (3.7% formaldehyde, 0.1 M  
153 phosphate buffer, 0.2% Triton) for 30 min, then rinsed with sterile distilled water.  
154 Samples were stained with CFW (10 µg/ml) for 5 min and washed with distilled water,

155 then stained with DAPI (0.8  $\mu\text{g}/\text{ml}$ ) for 30 min and finally de-stained with distilled  
156 water. Stained samples were examined by fluorescent microscopy (Olympus BX41)  
157 with a filter set (Olympus, U-MWU2 BP330~385).

### 158 **Mating assay**

159 Haploid *U. esculenta* strains subjected to mating assay were cultured on PDA medium  
160 at 28° for 3 days. Haploid yeast strains were individually re-suspended in sterile water  
161 and mixed in pairs with an equal amount. Then, a 5- $\mu\text{l}$  cell mixture was spotted onto  
162 PDA medium containing 1% charcoal. After 10 to 14 days, if two tested strains were  
163 compatible for mating, mating hyphae developed around the edge of the colony.  
164 Alternatively, for mating assay conducted on GMM medium (Shimizu and Keller  
165 2001), mating filaments were formed and visible within 3 to 5 days. Photos of mating  
166 colony were taken by camera (Coolpix P300, Nikon).

### 167 **DNA extraction**

168 To extract *U. esculenta* genomic DNA, strains were freshly grown in PDB with  
169 agitation at 28° for 60 hr. Cells were harvested by centrifugation and lyophilized. Cell  
170 materials of about 0.1 g were re-suspended in 500  $\mu\text{l}$  of 65° pre-warmed CTAB buffer  
171 (2% CTAB, 1.4 M NaCl, 20 mM EDTA, 100 mM Tris pH 8, 2% PVP-40) and 3  $\mu\text{l}$   
172 mercaptoethanol was added. Samples were incubated at 65° for 30 min and mixed  
173 every 10 min by inverting the tubes. After 30 min, 500  $\mu\text{l}$  phenol/chloroform (1:1  
174 volume ratio) was added. Samples were gently mixed and then spun at 15600 g for 15  
175 min. After centrifugation, the upper aqueous phase was transferred to a new tube and  
176 an equal volume of chloroform was added. Samples were gently mixed and spun at  
177 15600 g for 5 min. The upper aqueous phase was transferred to a new tube, and 0.7  
178 times the volume of isopropanol was added. Samples were inverted for 10 times, kept  
179 on ice for 10 min and underwent centrifugation at 15600 g for 5 min. Supernatants  
180 were discarded, and pellets were washed by adding 500  $\mu\text{l}$  of 75% ethanol. Samples

181 were spun at 15600 g for 5 min and supernatants were carefully removed. DNA  
182 pellets were air-dried, and 100 µl of sterile distilled water was added to re-suspend the  
183 DNA. DNA concentration was measured by spectrophotometry (NanoDrop 1000,  
184 Thermo Fisher Scientific, USA) and DNA samples were stored at -20°.

185 For PCR screening, DNA template was prepared by the fast preparation of  
186 fungal DNA (FPFD) method (Liu *et al.* 2011). First, a small quantity of yeast cells  
187 was suspended in 100 µl extraction buffer (15 mM Na<sub>2</sub>CO<sub>3</sub>, 35 mM NaHCO<sub>3</sub>, 2%  
188 PVP40, 0.2% BSA, 0.05% Tween20), then incubated at 95° for 15 min. The tube was  
189 immediately kept on ice and spun down by centrifugation. Then, 3 µl supernatant was  
190 used as template DNA for PCR reactions.

#### 191 **Identification of *U. esculenta* mating type-related genes by PCR**

192 To identify the mating type genes of *U. esculenta*, several PCR approaches were used.  
193 Sequences for evolutionally conserved genes related to mating type locus and  
194 flanking regions, including *bE*, *pra*, *lba1*, *panC*, *cld1* and *Nat1*, from related smut  
195 fungi were aligned. Conserved regions were identified, and specific or degenerate  
196 PCR primers were designed for PCR amplification as described (Albert and Schenck  
197 1996). PCR fragments with expected sizes were purified and underwent TA cloning  
198 (pGEM-T Easy, Promega). Transformants were screened and verified by sequencing.  
199 To amplify the complete A/B mating type locus, long-range PCR was conducted with  
200 primers designed on the flanking genes of the mating type locus. PCR conditions  
201 followed that suggested in the product manual (Q5 Hot Start High-Fidelity DNA  
202 Polymerase, New England Biolabs; TaKaRa LA Taq DNA Polymerase, TaKaRa Bio).  
203 Six *U. esculenta* isolates, 12JK1RB1-A1 (a1b1), 12JK1RB1-A2 (a3b3),  
204 12SB1RB1-B4 (a2b2), 13PJ1GB1-D3 (a1b1), 13PJ1GB1-D4 (a2b2), and  
205 13PJ3GB1-E1 (a3b3), were selected to determine the sequences of mating type locus.

#### 206 **Screening of *U. esculenta* mating type by multiplex PCR**



207 Three sets of idiomorph specific primers for mating type A and B gene clusters were  
208 designed to screen the mating type of *U. esculenta* isolates. Multiplex PCR reaction  
209 was performed as follows: denaturation at 94° for 3 min, 35 cycles of denaturation at  
210 94° for 45 sec, annealing at 55° for 30 sec, and extension at 72° for 25 sec, and final  
211 extension at 72° for 7 min.

### 212 **Illumina sequencing of *U. esculenta* genome**

213 To prepare high-quality genomic DNA for next-generation sequencing, a modified  
214 CTAB method was used (Winnepeninckx *et al.* 1993). Briefly, *U. esculenta* strains  
215 were first grown in PDB for 60 hr and cells were collected by centrifugation and  
216 lyophilized, then suspended in 800 µl of 60° pre-warmed CTAB buffer (2% CTAB,  
217 1.4 M NaCl, 20 mM EDTA, 100 mM pH 8 Tris, 2% PVP-40) plus 0.2%  
218 mercaptoethanol and 0.1 mg/ml proteinase K. Samples were incubated at 60° for 1 hr  
219 and gently inverted every 20 min. After incubation, 800 µl chloroform/isoamyl  
220 alcohol (24:1) was added and gently mixed for 2 min. Samples were then centrifuged  
221 at 14000 g for 10 min at 4°. The upper aqueous phase was transferred to a new tube,  
222 and 1 µl RNase (100 µg/µl) was added and kept at 37° for 90 min, then 600 µl  
223 isopropanol was added, mixed gently, and samples were kept at room temperature  
224 overnight to allow DNA precipitation. The next day, samples were centrifuged at  
225 14000 g for 15 min at 4°. Supernatants were discarded and pellets were washed by  
226 adding 800 µl of 75% ethanol. Samples were spun for 5 min at 15600 g, and  
227 supernatants were removed completely and pellets were air-dried. Finally, 100 µl  
228 sterile distilled water was added to re-suspend DNA pellet. DNA samples were  
229 quantified by Qubit (Invitrogen) and the concentration was adjusted to 10 ng/µl. For  
230 DNA shearing, Covaris S2 (Covaris, MA, USA) was used to break DNA into 200-bp  
231 fragments; fragments 200 to 700 bp were selected by using Ampure XP beads  
232 (Beckman Coulter Genomics, CA, USA).

233 Library construction involved the Illumina TruSeq DNA kit. First, the ends of  
234 size-selected fragments were repaired, and poly A nucleotides were added to 3' ends.  
235 Poly T complemented specific adaptors were linked to both ends of fragments and 10  
236 cycles of PCR amplification were conducted. The distribution of fragment size was  
237 confirmed by BioAnalyzer before next-generation sequencing (Agilent Technologies,  
238 CA, USA). Pair-ended sequencing with 250-bp reads was conducted with Illumina  
239 MiSeq (Illumina Inc., CA, USA) at the NGS Core (Center for Systems Biology,  
240 National Taiwan University).

241 The cluster density of sequencing was 1105 K/mm<sup>2</sup> and size of 12JK1RB1-A1  
242 and 12JK1RB1-A2 was 5.5 and 4.6 Gb. Three assembly programs were used: CLC  
243 bio, SOAPdenovo (Short Oligonucleotide Analysis Package) and velvet. Performance  
244 was assessed by read mapping rate and number of orthologous proteins between *U.*  
245 *esculenta* and *U. maydis*. The assembled results with CLC bio were better than with  
246 other methods and were used for gene annotation. The average base coverages were  
247 230 X and 194 X for 12JK1RB1-A1 and 12JK1RB1-A2.

#### 248 **Long-read PacBio sequencing**

249 The method was modified from the Gentra kit DNA extraction procedure. Briefly,  
250 3-day-old *U. esculenta* strains were first incubated in 5 ml PDB for 24 hr and then  
251 transferred to a 125-ml flask and grown for another 34 hr (no longer than 36 hr). Cells  
252 were then counted to approximate  $2 \times 10^8$  cells. First, samples were suspended in 300  $\mu$ l  
253 cell suspension solution and 60 mg VinoTaste (Novozymes), followed by reaction at  
254 37° for 1 hr. After that, 300  $\mu$ l cell lysis solution plus 1% SDS was added for  
255 incubation at 50° for another 30 min. Then, 100  $\mu$ l protein precipitation solution was  
256 added, followed by vigorously vortexing for 20 sec, then centrifugation for 3 min at  
257 16,000 g, then DNA was pelleted by inverting the tubes 50 times with the addition of  
258 300  $\mu$ l isopropanol. Pure DNA was acquired by washing with 70% Ethanol, 5 to 10

259 min air drying and re-suspended with 100  $\mu$ l DNA hydration solution. Finally, RNA  
260 was removed with 1.5  $\mu$ l RNase A solution and incubated at 37° for 60 min for  
261 enzyme reaction, then transferred to 65° water bath for 60-min incubation.

262 Genomic DNA was sheared by using a Covaris g-TUBE followed by purification  
263 via binding to pre-washed AMPure PB beads (Part no. PB100-265-900). After  
264 end-repair, the blunt adapters were ligated and underwent exonuclease incubation to  
265 remove all un-ligated adapters and DNA. The final “SMRT bells” were annealed with  
266 primers and bound to the proprietary polymerase by using the PacBio  
267 DNA/Polymerase Binding Kit P6 v2 (Part no. PB100-372-700) to form the “Binding  
268 Complex”. After dilution, the library was loaded onto the instrument with the DNA  
269 Sequencing Kit 4.0 v2 (Part no. PB100-612-400) and 4 SMRT Cells 8Pac for  
270 sequencing. A primary filtering analysis was performed with the RS instrument, and  
271 the secondary analysis involved using the SMRT analysis pipeline v2.3.0.

## 272 **Bioinformatics analysis**

273 Protein coding genes of *U. esculenta* were predicted by using GeneMark-ES  
274 (Borodovsky and Lomsadze 2011) to scan the assembled contigs, then the predicted  
275 genes were annotated in a similarity-based manner. NCBI-BLASTP (Altschul *et al.*  
276 1990) was used to search for homologous genes in UniRef clusters (Suzek *et al.* 2015).  
277 When finding significantly similar hits to a predicted gene (*i.e.*, with e-value < 10<sup>-4</sup>, low  
278 complexity filtering by using SEG program), the annotation information was retrieved  
279 from the best hit; otherwise, HMMer and Pfam HMM models were used to predict the  
280 protein domains in the encoded amino-acid sequences of the genes remaining  
281 unannotated in the similarity-based annotation step (Durbin *et al.* 1998; Finn *et al.*  
282 2016).

283 Repeat and transposable elements were predicted by using RepeatModeler 1.0.8  
284 plus the RMBlast search tool (Smit and Hubley; Smit *et al.*) and TransposonPSI (Haas).

285 Part of the genome comparison analysis was carried out by using MUMmer 3.23 (Kurtz  
286 *et al.* 2004) and diagrammed by using Easyfig 2.2 (Sullivan *et al.* 2011). Comparative  
287 analysis of the UE genome with 10 other fully-sequenced fungal genomes, including  
288 *Aspergillus nidulans*, *Cryptococcus neoformans*, *Magnaporthe oryzae*, *Neurospora*  
289 *crassa*, *Phytophthora infestans*, *Puccinia graminis*, *Saccharomyces cerevisiae*,  
290 *Sporisorium reilianum*, *Ustilago maydis* and *Ustilago hordei*, involved using the  
291 Ensembl Compara pipelines, with inter-species syntenic regions and phylogenetic trees  
292 of all protein-coding genes inferred by using the Lastz-net pipeline (Kent *et al.* 2003)  
293 and the GeneTrees pipeline (Vilella *et al.* 2009), respectively. All the results of genome  
294 annotation and comparative analysis were integrated into a locally maintained Ensembl  
295 genome database and browser system for further data mining and visualization.

#### 296 **Inoculation experiment**

297 For inoculation experiments, *U. esculenta* isolates were first cultured on PDA  
298 medium at 28° for 5 to 7 days. Uninfected *Z. latifolia* plants collected from the field  
299 were used for inoculation. Collected plants were initially washed clean with tap water.  
300 Unwanted leaves, leaf sheaths, and roots were removed, and 15 to 20 cm long of basal  
301 stems containing young buds were saved. Basal stem tissues were further washed with  
302 distilled water, kept in a plastic box containing perlite and distilled water, then grown  
303 in a controlled growth chamber with the conditions of 24°, 75% relative humidity, 8  
304 hr daylight with light intensity 75  $\mu\text{mol s}^{-1} \text{m}^{-2}$  for 3 to 5 days to maintain viability.  
305 After incubation, the buds showing vigorous viability were selected for inoculation.  
306 Outer layers of leaf sheath surrounding the buds were removed and two tiny holes  
307 pierced into one bud tissue were created by using an insect-pinning pin. Yeast cells of  
308 compatible *U. esculenta* isolates were mixed in equal amount and applied to wounded  
309 sites on buds. The inoculated samples were placed back into a perlite box and tightly  
310 covered with a plastic bag to retain humidity. The plastic bag was dislodged 3 days

311 later, and inoculated samples were maintained in a controlled growth chamber at 24°,  
312 75% relative humidity, 8-hr daylight with light intensity 75  $\mu\text{mol s}^{-1} \text{m}^{-2}$ . After 2  
313 weeks, surviving buds were excised, transferred to soil pots and grown in a  
314 greenhouse. Evaluation of successful inoculation rate was conducted 4 to 6 weeks  
315 post-inoculation by examining whether swelling of the basal stem occurred.

#### 316 **Data availability**

317 All data necessary for confirming the conclusion of the article are present in the  
318 article, figures and tables. Sequencing data used in this research was deposited in the  
319 NCBI (data will be submitted to NCBI later). Figure S1 presents the reads coverage of  
320 genome of *MAT-1*. Figure S2 illustrates the syntenic region of *MAT* loci between *U.*  
321 *esculenta* and *U. hordei*. Table S1 and S2 are *U. esculenta* strains isolated from the  
322 fields. Table S3 presents the primer sets used in this study.

323

## 324 **RESULTS**

### 325 **Field plant collection and isolation of *U. esculenta***

326 Two field cultivars, red and green shells, were collected from northern Taiwan  
327 (Jinshin) and central Taiwan (Puli), respectively (Figure 1A). According to the  
328 presence of teliospores, these collections were classified into three groups: Baishin,  
329 Huashin and Heishin. Baishin refers to a snowy white gall without teliospores (Figure  
330 1B, C). Heishin is known by a huge number of teliospores scattered inside the gall,  
331 whereas Huashin has fewer teliospores. Furthermore, Heishin is smaller and grows  
332 faster than Huashin during the harvest time (Figure 1D).

333 *U. esculenta* strains were isolated by micromanipulation or directly from plant  
334 tissue. With the former method, 59 strains were separated from Heishin tissue,  
335 including 44 strains from 11 sets of four meiotic progenies and 15 strains from 7

336 incomplete sets. Strains from Baishin and Huashin were directly isolated from plant  
337 tissue: 9 from Baishin tissue and 77 from Huashin tissue (Table S1, S2, S3).

### 338 **Life cycle of *U. esculenta***

339 Most smut fungi share a similar life cycle pattern; however, *U. esculenta* is slightly  
340 different from others because of the artificial vegetative propagation. For more than  
341 100 years, farmers have tried to avoid the development of teliospores in the paddy  
342 field. Thus, most *U. esculenta* strains in the wild remain in the hyphae state. Under  
343 natural circumstances, as for other smut fungi, *U. esculenta* infects host plants as  
344 filaments and produces tumor-like tissue and teliospores (Figure 2A). Teliospores  
345 germinated and produced 2 septa, then evolved to 5 or 6 septa in promycelium while 4  
346 meiotic yeast-like sporidia were produced. The fourth sporidia usually budded from  
347 the teliospore directly. Likewise, sporidia, which were unicellular or multicellular,  
348 also performed an *in vitro* asexual cycle. When opposite sporidia were conjugated and  
349 formed sexual filaments, we found three characteristics in the mating filaments by  
350 using DAPI and CFW stains. In young filaments, the front end region included living  
351 cells and dead cells, which were present as empty-cytoplasm sections. In the late stage,  
352 several dikaryotic cells appeared at the tip region, and the monokaryotic yeast cells  
353 budded from the growth tip and the edge of some septa (Figure 2E-2H).

### 354 ***U. esculenta* features heterothallism**

355 *U. esculenta* is known as a heterothallic fungi. To reveal the mating type system, we  
356 used mating assay by inter/intra-mating assay of 6 sets of teliospore-isolated strains,  
357 including 3 sets from green shell cultivars (13PJ1GB1, 13PJ3GB1, 13PS2GB1) and 3  
358 sets from red shell cultivars (2 from 12SB1RB1 and 1 from 12JK1RB1). For the  
359 intra-mating results, 4 of 6 crossings showed furry colonies (Figure 3A), so two  
360 different mating types were present in the 4 meiotic progenies. For the inter-mating  
361 results, both 8 and 12 compatible crossings were observed among the 16 crossings

362 (Figure 3B, C). The former result featured two different mating type loci in 8 strains,  
363 and the later result more than 2 mating types (Table 1).

#### 364 ***U. esculenta* has 3 idiomorphs of mating type**

365 We used the PCR primer sets for *U. scitaminea* *bE* gene (Albert and Schenck 1996),  
366 then designed degenerate PCR to amplify the flanking genes of A and B gene  
367 complexes. The flanking genes *cld1*, *nat1*, *lba1* and *panC* were amplified. To obtain  
368 the complete sequence of mating type, whole-genome sequencing of 12JK1RB1-A1  
369 (*MAT-1*) and 12JK1RB1-A2 (*MAT-3*) involved using Illumina Hi-seq.

370 Sequences of the non-coding region between *bE* and *bW* genes and the partial  
371 sequence of *bW* gene were highly diverse. By comparing this region among 23  
372 field-collected strains, we found 3 different lengths of amplicons: 2,028, 2,130 and  
373 2,141 bp, which were partial sequences of *MAT-1*, *MAT-2* and *MAT-3*. The primer set  
374 used was wc1529 and wc1531 (Table S4).

375 The full sequences of A and B gene complexes were obtained by PCR cloning  
376 or whole-genome sequencing (primer sets: Table S4). The length of three A gene  
377 complexes was 6,455, 8,129 and 7,156 bp, respectively, with B gene complexes 7,433,  
378 7,325 and 14,165 bp respectively.

#### 379 **Differences in *MAT* locus within *U. esculenta* strains and other species**

380 A gene complex in *U. esculenta* includes several genes: pheromone receptor (*pra*),  
381 two pheromones (*mfa*) and *lga/rga* and is flanked by a left-border protein (*lba*) and  
382 right-border protein (*rba*) (Figure 4). The B gene complex, which was flanked by  
383 proposed nuclear regulator (*cld1*) and N-terminal acetyltransferase (*Nat1*) genes,  
384 mainly contained b West (*bW*) and b East (*bE*) genes (Figure 5). Three a/b gene  
385 complexes share high synteny with other smut fungi, including *U. maydis*, *U. hordei*,  
386 and *S. reilianum*.

387 The pheromone-receptor (P/R) system of *U. esculenta* involved three Pra  
388 proteins and six Mfa proteins. Phylogenetic trees (Figure 6B, C) revealed that both  
389 Mfa and Pra proteins are divided into 3 clades. The similarity of Mfa and Pra proteins  
390 in each clade was up to 90% (76-90%) and 86% (76-86%). However, the similarity of  
391 *U. maydis* Mfa2 to other proteins in the same clade was merely 56% to 65% (Figure  
392 6B). Also, *mfa1.3* and *mfa2.3* showed a slight difference at the N-terminus but might  
393 be identical after processing (Figure 6A).

394 Two mitochondria inheritance-related genes, *rga2* and *rga3*, encoding a  
395 mitochondrial targeting signal (MTS), were detected among *U. esculenta* populations,  
396 and were located on the a2 and a3 gene complex, respectively (Figure 4). The protein  
397 similarity of the 2 Rga proteins was 49%, and that of homologous genes in another  
398 smut fungi *Ustilanciosporium gigantosporum* was 90%. Rga2 of *U. esculenta* was  
399 much closer to those of other species, including *Sporisorium walker*, *Macalpinomyces*  
400 *eriachnes*, *U. maydis* and *S. reilianum*, than its own Rga3 protein. As well, rga3  
401 protein of *U. esculenta* showed 66% similarity to *U. xerochloae* protein and 52%  
402 similarity to *U. gigantosporum* protein. The 2 *rga* genes might have evolved from 2  
403 different ancestors (Figure 7). However, in another Chinese isolate, MMT, rga3 is  
404 missing and is replaced by a transposon-related region (Ye *et al.* 2017). This finding  
405 indicates the high activation of transposable elements in the *U. esculenta* population.

406 Another genetic variation event occurred on the *MAT* locus. Fot1 family DNA  
407 transposon was inserted in the b gene complex. This characteristic was reported in  
408 other isolates and was similar to *S. reilianum* SRZ2 and *S. scitamineum* SscI8 but with  
409 the opposite site of the b gene complex (Figure 5). Transposons in *U. esculenta* b1  
410 and b2 gene complexes were both 2256 bp and showed 99% similarity. However, the  
411 transposon on the b3 gene complex was an exception — 9087 bp — and inserted by  
412 several short repeats and sequence. The repeats range from 30 to 69 bp (Figure 5).



413 **Mating type system of *U. esculenta* is bipolar**

414 Complete *MAT-1* and *MAT-2* loci were retrieved from 12JK1RB1-A1 (*MAT-1*) and  
415 UE\_mtsf (*MAT-2*) and underwent single molecule real time (SMRT) sequencing. The  
416 mating type locus (*MAT*) was identified by using previous identified a and b gene  
417 complexes. The *MAT-1* region was covered by 81.15 sequencing reads, on average,  
418 which indicated high confidence of its correctness (Figure S1). The sequences within  
419 *MAT-1* were variable. *MAT-1* was 555,862 bp and included 115 genes (Table S5) and  
420 more than 20 transposable elements predicted by TransposonPSI. About 44.28%  
421 featured repeats, with greater proportion than in the non-MAT region (33.13%).

422 Sequence-region comparison revealed similarity of 2 sequences. *U. esculenta*  
423 *MAT-1* and *MAT-2* sequences showed 66.1% identity by pairwise global alignment  
424 (blastn). However, about 61.8% (343,440/555,862 bp) of the *MAT-1* sequence showed  
425 synteny to *MAT-2* and more than 95% identity to each other. However, most of the  
426 rest of the *MAT-1* region (39.2%) was an intergenic region and occupied by repeats or  
427 transposable elements. Some repeats on *MAT-1* were similar (80% to 94% identity) to  
428 those of *MAT-2* and spotted on several locations. These sequence phenomena were  
429 similar to those for *U. hordei* *MAT-1*.

430 Both *U. esculenta* and *U. hordei* mating systems were bipolar but with extremely  
431 different mating type locus (*MAT*). Only a partial sequence of *U. esculenta* *MAT-1*  
432 was similar to *U. hordei* chromosome 2. In contrast, *U. esculenta* shared more  
433 consensus regions of *MAT-1* and sex chromosome with *U. maydis* (Figure 8) and had  
434 a continuous similar sequence with *S. reilianum* (Figure 9). This observation  
435 suggested the high relatedness among *U. esculenta*, *U. maydis* and *S. reilianum*  
436 during species evolution. Both *U. esculenta* and *U. hordei* underwent a certain genetic  
437 event, probably similar, for repeats to have a high portion of mating type locus and to

438 prevent *MAT* loci recombination, so the mating systems are bipolar rather than  
439 tetrapolar.

#### 440 **Recombination of mating type locus was suppressed in sexual progenies**

441 *U. maydis* was tetrapolar because the mating type sequence on its four sporidia  
442 (progenies) underwent recombination event during meiosis (Kües *et al.* 2011). To  
443 discover whether such phenomena occurred on the *MAT* locus of *U. esculenta*, we  
444 gathered teliospores from 2 inoculated plants and incubated their sexual progenies to  
445 analyze their mating types. The mating analysis involved using complex PCR (Figure  
446 10).

447 The first group including 466 strains was the offspring of 13PS2GB1-A3  
448 (*MAT-3*) and 13PS2GB1-A4 (*MAT-2*). By using multiplex RCR, we found only 2  
449 mating types, *MAT-2* (a2/b2) and *MAT-3* (a3/b3), which were the same type as their  
450 parental strains. Similar results were found in another group [13PJ3GB1-A2 (*MAT-1*)  
451 × 13PJ3GB1-A4 (*MAT-3*)] (Table 2). Because no recombination occurred on the  
452 mating type locus during meiosis, the mating system of *U. esculenta* was bipolar.

453

#### 454 **DISCUSSION**

455 Water bamboo cultivars have been used for long-term artificial selection. However,  
456 we do not thoroughly understand the mating system and the impact on gall formation.  
457 By studying recombination on the mating type locus and by whole-genome  
458 sequencing, we revealed that the mating system of *U. esculenta* is bipolar and has  
459 three different mating type loci: *MAT-1* (555,863 bp), *MAT-2* (508,427 bp) and  
460 *MAT-3*. The characteristics of *MAT-1* are similar to *U. hordei* *MAT-1*, including  
461 accumulation of insertion elements and different sizes of idiomorphs. Most of *MAT-1*  
462 is highly syntenic to sex chromosomes of *U. maydis* and *S. reilianum*, which indicates

463 the occurrence of a recombination event. Several transposable elements (TEs) occur  
464 within the region of mating-related genes (a/b gene complexes): one isolate carries  
465 *rga*, but the corresponding region on another isolate is replaced by TEs. The other  
466 example is the appearance of *fot1* family transposons on each B-gene complex, which  
467 are located at different positions, as compared with *S. reilianum*.

#### 468 ***U. esculenta* strain study in Taiwan**

469 In the 145 Taiwanese isolates, three mating types are distributed randomly around  
470 Taiwan and can invade both green and red cultivars (Table 3). These observations  
471 suggest no distributional differences of mating type in Taiwan.

472 All collected isolates are from Heishin (T strain), Haushin (unknown strain) or  
473 Baishin (MT strain) (Yang and Leu 1978). T strains produce teliospores, but M-T  
474 strains do not. With our observations and literature studies, Baishin is prone to  
475 transform to Heishin plants under poor weather or in older plants. As compared with  
476 Heishin, Baishin is favored by the farmer because of its financial value in the market.  
477 However, in this study, we used Heishin isolates for several reasons. Heishin isolates  
478 have a complete life cycle and produce teliospores. Its haploid strains are easier to  
479 isolate and to use for *in vitro* studies than are Baishin isolates. Furthermore, because it  
480 has a natural instinct for producing sexual progeny to finish its life cycle, the M-T  
481 strain (Baishin) may be a mutant of the T strain (Heishin).

#### 482 **Two teliospore-related genes, *hda1* and *rum1*, are slightly different between *mtsf* 483 **and JSKK29****

484 Teliospores form after undergoing a series of filament morphological changes:  
485 branching, collapsing, swelling, fragmentation, and teliospore formation (Banuett and  
486 Herskowitz 1996). During the procedure, several proteins, Fuz1, Hgl1, (histone  
487 deacetylase) Hda1 and Rum1 (homology of human retinoblastoma binding protein 2),  
488 are involved in teliospore formation. Gene mutants would cause the absence of

489 teliospores (Chew *et al.* 2008). In our morphological and staining studies of JSKK29,  
490 we observed only hyphae branching and partial empty septa. Protein sequence  
491 alignment revealed a difference of three peptides between mtsf and JSKK29 in hda1  
492 and rum1, which showed 99.49% and 99.87% identity, respectively. Clarifying the  
493 cause of teliospores in the water bamboo needs further study.

#### 494 **Mating type-related genes reveal the evolutionary information of *U. esculenta***

495 *U. esculenta* has 3 idiomorphs, *MAT-1*, *MAT-2* and *MAT-3*. Its gene structure is  
496 similar to that of *S. reilianum*, which harbors 2 pheromones on each A mating type  
497 locus. We examined all pheromones of *U. esculenta* and related smut fungi (Figure 5).  
498 Two pheromones received by the same receptor, such as Mfa3.1 and Mfa2.1  
499 activating Pra1, are very similar regardless of pre- or pro-mature peptides. However,  
500 pre-mature peptides of Mfa2.3 and Mfa1.3 at the N-terminal in *U. esculenta* differ.  
501 The Mfa2.3 sequence is similar to that of *S. reilianum* Mfa1.2 and Mfa3.2, whereas  
502 the Mfa1.3 sequence is much closer to that of *S. reilianum* Mfa1.3 and Mfa2.3. This  
503 divergent sequencing is evidence of the evolutionary remnant between 2 groups of  
504 pheromones.

505 *lga* and *rga* are 2 uniparental mitochondrial-related genes on the A gene complex.  
506 Because mutation accumulation usually occurs in mitochondrial inheritance,  
507 investigating these 2 genes may reveal clues about the original species of smut fungi  
508 (Hoekstra 2000; Fedler *et al.* 2009). Both *U. maydis* and *S. reilianum* carry one *lga*  
509 and *rga* on the a2 gene complex, whereas *U. esculenta* harbors one *lga*-like gene and  
510 2 *rga* genes on *MAT-2* and *MAT-3*. The proteins Lga and Rga interfere with  
511 mitochondria fusion and regulate pathogenicity in the presence or absence of *mrbl*  
512 and *dnm1* (Bortfeld *et al.* 2004; Mahlert *et al.* 2009; Fedler *et al.* 2009). Because *U.*  
513 *esculenta* has the homologous genes of *mrbl* and *dnm1* and its *lga* is not complete as  
514 for other smut fungi, *lga* might not be required in *U. esculenta*, which underwent

515 long-term human selection. *U. esculenta* has 2 *rga* genes (*rga2* and *rga3*) on *MAT-2*  
516 and *MAT-3*. *U. gigantosporum* carries 2 Rga proteins as well. However, its genes  
517 show high identity (90% identity), whereas those in *U. esculenta* do not (49%  
518 identity). As well, *rga3* in isolates from China were lost and replaced by TEs.  
519 Because China has a longer cultivar history of water bamboo than Taiwan, this gene  
520 variation event indicates that *rga* is less important than other mating-related genes.

521 **Pheromone precursors of *pra3* in *U. esculenta* support that the third R/P system**  
522 **is a variation of other two**

523 *U. esculenta* has 3 pheromone precursors and a pheromone receptor (P/R) system  
524 similar to *S. reilianum*. The third pheromone–pheromone receptor system is found  
525 only in the basidiomycetes (Kües *et al.* 2011) and is divergent from a common  
526 ancestor of other 2 systems. Our phylogenetic analysis (Figure 5B, C) revealed the  
527 same result of three pheromone–pheromone receptor systems separated into 3 clades.  
528 As well, the pheromone precursors of *U. esculenta* Mfa1.3 and Mfa2.3 differ at the  
529 N-terminus. The former shows a closer relationship to other pheromones identified by  
530 the Pra2 protein, whereas another pheromone is more similar to Mfa1.3 and Mfa2.3 in  
531 *S. reilianum*. This observation supports that the third pheromone–pheromone receptor  
532 system is a variation of the other two.

533 **The mating type locus of *U. esculenta* provides evidence to study the history of**  
534 ***MAT* evolution**

535 *U. esculenta* has a multiple-factor bipolar mating system. Its mating type locus (*MAT*)  
536 has several characteristics described in the *U. hordei* *MAT*, such as accumulation of a  
537 repetitive sequence that suppresses the recombination and the size variation of *MAT*,  
538 which is caused by the insertion of TEs. The *U. hordei* bipolar system may be created  
539 by recombination of the *S. reilianum* (tetrapolar) sex chromosome (Bakkeren *et al.*

540 2006). However, whether the tetrapolar system evolved from the bipolar system or to  
541 the bipolar system is debated (Kües *et al.* 2011).

542 *MAT-1* and *MAT-2* of *U. esculenta* are 555,863 and 508,427 bp. *MAT-1* is  
543 located on the unitig\_12, with length of 2,000,476 bp, with one complete telomere. In  
544 terms of sequence comparison, a sequence recombination event on large fragments  
545 occurred (Figure 8). About half of the *U. esculenta* unitig\_12 length is syntenic to *U.*  
546 *maydis* chromosome 1 and the other to chromosome 5. Because the event and  
547 outcome are similar to that in *U. hordei*, believed to be degenerated from *S. reilianum*,  
548 the sequence event of *U. esculenta* might be the same as *U. hordei*: both species  
549 underwent sequence recombination on the sex chromosome. Sex chromosomes of *U.*  
550 *esculenta* and *U. hordei* are very similar, except for the *MAT* regions. Part of the  
551 sequence of *U. esculenta* *MAT* is similar to *U. hordei* chromosome 2, which is in  
552 partial synteny to *S. reilianum* chromosome 20. Genes on this syntenic region in *U.*  
553 *hordei* chromosome 2 are dense but are scattered in *U. esculenta* and inserted with  
554 repetitive sequences. Some repetitive sequences are shared between these 2 species  
555 and located on *MAT* and also all other sequences on the unitig\_12 (Figure S2).  
556 Comparative analysis revealed that *U. esculenta* underwent a sequence variation event  
557 as compared with 3 other smut fungi (*U. maydis*, *U. hordei*, *S. reilianum*) and their  
558 specialization is closely related. The discovery of the mating type of *U. esculenta*  
559 provides evidence to study the evolution of the mating type system.

560 Many studies have investigated how *U. esculenta* and its host *Z. latifolia*  
561 cooperate. The mating type locus is highly related to the development of filaments  
562 and controls the process of infection. However, we still do not understand how *U.*  
563 *esculenta* invades its host, how the process of tumor-like tissue formation is related to  
564 infection, and whether different mating type conjugations interfere with the size of  
565 tumor-like tissue. Such issues are worth of further study.

566

567

568

569

570

571

572

573 **REFERENCES**

574 Albert, H. H., and S. Schenck, 1996 PCR amplification from a homolog of the bE  
575 mating-type gene as a sensitive assay for the presence of *Ustilago scitaminea*  
576 DNA. *Plant Dis.* 80: 1189–1192.

577 Altschul, S. F., W. Gish, W. Miller, E. W. Myers, and D. J. Lipman, 1990 Basic local  
578 alignment search tool. *J. Mol. Biol.* 215: 403–410.

579 Anderson, C. M., D. A. Willits, P. J. Kosted, E. J. Ford, A. D. Martinez-Espinoza *et*  
580 *al.*, 1999 Molecular analysis of the pheromone and pheromone receptor genes of  
581 *Ustilago hordei*. *Gene* 240: 89–97.

582 Bakkeren, G., and J. W. Kronstad, 1994 Linkage of mating-type loci distinguishes  
583 bipolar from tetrapolar mating in basidiomycetous smut fungi. *Proc Natl Acad*  
584 *Sci U S A* 91: 7085–7089.

585 Bakkeren, G., G. Jiang, R. L. Warren, Y. Butterfield, H. Shin *et al.*, 2006 Mating  
586 factor linkage and genome evolution in basidiomycetous pathogens of cereals.  
587 *Fungal Genet. Biol.* 43: 655–666.

588 Bakkeren, G., J. Kämper, and J. Schirawski, 2008 Sex in smut fungi: Structure,  
589 function and evolution of mating-type complexes. *Fungal Genet. Biol.* 45: S15–  
590 S21.

- 591 Banuett, F., and I. Herskowitz, 1996 Discrete developmental stages during teliospore  
592 formation in the corn smut fungus, *Ustilago maydis*. *Development* 122:.
- 593 Borodovsky, M., and A. Lomsadze, 2011 Eukaryotic gene prediction using  
594 GeneMark.hmm-E and GeneMark-ES. *Curr. Protoc. Bioinforma.* Chapter 4: Unit  
595 4.6.1-10.
- 596 Bortfeld, M., K. Auffarth, R. Kahmann, and C. W. Basse, 2004 The *Ustilago maydis*  
597 a2 mating-type locus genes *lga2* and *rga2* compromise pathogenicity in the  
598 absence of the mitochondrial p32 family protein Mrb1. *Plant Cell* 16: 2233–  
599 2248.
- 600 Brefort, T., G. Doehlemann, A. Mendoza-Mendoza, S. Reissmann, A. Djamei *et al.*,  
601 2009 *Ustilago maydis* as a pathogen. *Annu. Rev. Phytopathol.* 47: 423–445.
- 602 Chan, Y. S., and L. B. Thrower, 1980 The host-parasite relationship between *Zizania*  
603 *caduciflora* Turcz. and *Ustilago esculenta* P. Henn. *New Phytol.* 85: 201–207.
- 604 Chew, E., Y. Aweiss, C.-Y. Lu, and F. Banuett, 2008 Fuz1, a MYND domain protein,  
605 is required for cell morphogenesis in *Ustilago maydis*. *Mycologia* 100: 31–46.
- 606 Chung, K. R., and D. D. Tzeng, 2004 Biosynthesis of indole-3-acetic acid by the  
607 gall-inducing fungus *Ustilago esculenta*. *J. Biol. Sci.* 4: 744–750.
- 608 Durbin, R., S. Eddy, A. Krogh, and G. Mitchison, 1998 *Biological sequence analysis:*  
609 *probabilistic models of proteins and nucleic acids*. Cambridge University Press.
- 610 Fedler, M., K.-S. Luh, K. Stelter, F. Nieto-Jacobo, and C. W. Basse, 2009 The a2  
611 mating-type locus genes *lga2* and *rga2* direct uniparental mitochondrial DNA  
612 (mtDNA) inheritance and constrain mtDNA recombination during sexual  
613 development of *Ustilago maydis*. *Genetics* 181: 847–60.
- 614 Finn, R. D., P. Coghill, R. Y. Eberhardt, S. R. Eddy, J. Mistry *et al.*, 2016 The Pfam  
615 protein families database: towards a more sustainable future. *Nucleic Acids Res.*  
616 44: D279–D285.



- 617 Haas, B. TransposonPSI: an application of PSI-blast to mine (Retro-)transposon ORF  
618 homologies.
- 619 Hoekstra, R. F., 2000 Evolutionary origin and consequences of uniparental  
620 mitochondrial inheritance. *Hum. Reprod.* 15 Suppl 2: 102–11.
- 621 Horns, F., E. Petit, R. Yockteng, and M. E. Hood, 2012 Patterns of repeat-induced  
622 point mutation in transposable elements of basidiomycete fungi. *Genome Biol.*  
623 *Evol.* 4: 240–247.
- 624 Hung, S. F., S. L. Chang, and I. T. Chen, 2001 Using random amplified polymorphic  
625 DNA (RAPD) markers to identify the clones of coba (*Zizania latifolia* Turcz.)  
626 and their *Ustilago esculenta* P. Henn. *J. Taiwan Soc. Hortic. Sci.* 47: 331–340.
- 627 Jose, R. C., S. Goyari, B. Louis, S. D. Waikhom, P. J. Handique *et al.*, 2016  
628 Investigation on the biotrophic interaction of *Ustilago esculenta* on *Zizania*  
629 *latifolia* found in the Indo-Burma biodiversity hotspot. *Microb. Pathog.* 98: 6–  
630 15.
- 631 Kent, W. J., R. Baertsch, A. Hinrichs, W. Miller, and D. Haussler, 2003 Evolution’s  
632 cauldron: duplication, deletion, and rearrangement in the mouse and human  
633 genomes. *Proc. Natl. Acad. Sci. U. S. A.* 100: 11484–9.
- 634 Kües, U., T. Y. James, and J. Heitman, 2011 6 Mating type in basidiomycetes:  
635 unipolar, bipolar, and tetrapolar patterns of sexuality, pp. 97–160 in *Evolution of*  
636 *fungi and fungal-Like organisms*, Springer Berlin Heidelberg, Berlin,  
637 Heidelberg.
- 638 Kurtz, S., A. Phillippy, A. L. Delcher, M. Smoot, M. Shumway *et al.*, 2004 Versatile  
639 and open software for comparing large genomes. *Genome Biol.* 5: R12.
- 640 Laurie, J. D., S. Ali, R. Linning, G. Mannhaupt, P. Wong *et al.*, 2012 Genome  
641 comparison of barley and maize smut fungi reveals targeted loss of RNA

- 642 silencing components and species-specific presence of transposable elements.  
643 Plant Cell 24: 1733–1745.
- 644 Lee, N., G. Bakkeren, K. Wong, J. E. Sherwood, and J. W. Kronstad, 1999 The  
645 mating-type and pathogenicity locus of the fungus *Ustilago hordei* spans a  
646 500-kb region. Proc. Natl. Acad. Sci. U. S. A. 96: 15026–31.
- 647 Liu, K. H., Y. L. Yeh, and W. C. Shen, 2011 Fast preparation of fungal DNA for PCR  
648 screening. J. Microbiol. Methods 85: 170–172.
- 649 Mahlert, M., C. Vogler, K. Stelter, G. Hause, and C. W. Basse, 2009 The a2  
650 mating-type-locus gene *lga2* of *Ustilago maydis* interferes with mitochondrial  
651 dynamics and fusion, partially in dependence on a Dnm1-like fission component.  
652 J. Cell Sci. 122: 2402–2412.
- 653 Martinez-Espinoza, A. D., Gerhardt, S. A., Sherwood, J. E., 1993 Morphological and  
654 mutational analysis of mating in *Ustilago hordei*. Exp. Mycol. 17: 200–214.
- 655 Nielsen, K., and J. Heitman, 2007 Sex and virulence of human pathogenic fungi. Adv.  
656 Genet. 57: 143–147.
- 657 Shimizu, K., and N. P. Keller, 2001 Genetic involvement of a cAMP-dependent  
658 protein kinase in a G protein signaling pathway regulating morphological and  
659 chemical transitions in *Aspergillus nidulans*. Genetics 157: 591–600.
- 660 Smit, A., and R. Hubley RepeatModeler.
- 661 Smit, A., R. Hubley, and P. Green RepeatMasker.
- 662 Stakman, E. C., and J. J. Christensen, 1927 Heterothallism in *Ustilago zaeae*.  
663 Phytopathology 17: 34–38.
- 664 Sullivan, M. J., N. K. Petty, and S. A. Beatson, 2011 Easyfig: a genome comparison  
665 visualizer. Bioinformatics 27: 1009–1010.

- 666 Suzek, B. E., Y. Wang, H. Huang, P. B. McGarvey, C. H. Wu *et al.*, 2015 UniRef  
667 clusters: a comprehensive and scalable alternative for improving sequence  
668 similarity searches. *Bioinformatics* 31: 926–32.
- 669 Vilella, A. J., J. Severin, A. Ureta-Vidal, L. Heng, R. Durbin *et al.*, 2009  
670 EnsemblCompara GeneTrees: complete, duplication-aware phylogenetic trees in  
671 vertebrates. *Genome Res.* 19: 327–35.
- 672 Wang, Z. D., N. Yan, Z. H. Wang, X. H. Zhang, J. Z. Zhang *et al.*, 2017 RNA-seq  
673 analysis provides insight into reprogramming of culm development in *Zizania*  
674 *latifolia* induced by *Ustilago esculenta*. *Plant Mol. Biol.* 95: 533–547.
- 675 Winnepeninckx, B., T. Backeljau, and R. De Wachter, 1993 Extraction of high  
676 molecular weight DNA from molluscs. *Trends Genet.* 9: 407.
- 677 Yang, H. C., and L. S. Leu, 1978 Formation and histopathology of galls induced by  
678 *Ustilago esculenta* in *Zizania latifolia*. *Phytopathology* 68: 1572–1576.
- 679 Ye, Z., Y. Pan, Y. Zhang, H. Cui, G. Jin *et al.*, 2017 Comparative whole-genome  
680 analysis reveals artificial selection effects on *Ustilago esculenta* genome. *DNA*  
681 *Res.* 24: 635–648.
- 682 Zhang, J. Z., F. Q. Chu, D. P. Guo, K. D. Hyde, and G. L. Xie, 2012 Cytology and  
683 ultrastructure of interactions between *Ustilago esculenta* and *Zizania latifolia*.  
684 *Mycol. Prog.* 11: 499–508.
- 685 Zhang, Y., Q. Cao, P. Hu, H. Cui, X. Yu *et al.*, 2017 Investigation on the  
686 differentiation of two *Ustilago esculenta* strains - implications of a relationship  
687 with the host phenotypes appearing in the fields. *BMC Microbiol.* 17: 228.
- 688
- 689

690 **Figure legends**

691 **Figure 1** Water bamboo plants in the commercial field and features of each edible  
692 gall in different Taiwan varieties. (A) Red shell variety of water bamboo was  
693 cultivated in Sanchi, Taiwan. (B) Features of the red shell variety. From left to right:  
694 appearance of edible gall, gall without leaf sheath, longitudinal section of gall. (C)  
695 Features of the green shell variety. From left to right: appearance of edible gall, gall  
696 without leaves sheath, longitudinal section of gall. (D) Swelling galls with black  
697 teliospore sori. Mature galls of red shell variety collected from Sanchi show different  
698 levels of sori formation; left: sori scattered in the swelling tissue, or huashin, right:  
699 gall full of sori, or heishin.

700

701 **Figure 2** Life cycle and morphological features of *U. esculenta*. (A) The life cycle of  
702 *U. esculenta* is associated with infection of *Zizania latifolia* Turcz. In the asexual  
703 cycle, *U. esculenta* grows as yeast/sporidia and reproduces asexually by budding. In  
704 the sexual cycle, two compatible sporidial cells produce conjugated filaments to fuse  
705 and generate mating hyphae. Budding yeast cells at the front parts and empty cell  
706 compartments are usually observed. Mating filaments penetrate into host plants and  
707 develop swelling galls at the basal stem, which was stimulated to grow by the  
708 disturbance of phytohormone homeostasis. Teliospore sori are then produced in the  
709 interior of mature galls. Teliospores are diploid, which gave rise to promycelium,  
710 followed by meiosis and produce four haploid yeast cells with two different mating  
711 types. (B) Teliospores collected from infected plants were induced to germinate on  
712 PDA medium. Several septa and four sporidia were observed after 20 hr. (C) *U.*  
713 *esculenta* sporidia existed as single or multiple yeast formed cells. (D) DAPI staining  
714 of sporidia in sample (C) revealed a single nucleus in each cell. (E) Two compatible  
715 haploid sporidia conjugated to produce mating hypha (red arrow). (F) DAPI and CFW

716 staining of sample (E) show the positions of nuclei and septa. (G) Mating hyphae of *U.*  
717 *esculenta* were characterized by empty cell compartment (red arrow). The right top  
718 was the direction of hyphal growth. (H) DAPI and CFW staining of sample (G) show  
719 both mononuclear and binuclear cells at the front end. Monokaryons and dikaryons  
720 are indicated with white and yellow arrows, respectively.

721

722 **Figure 3** Mating assay of *U. esculenta* isolates derived from the meiotic progenies of  
723 teliospores. (A) Mating assay of the 4 meiotic progenies of teliospore 12JK1RB1\_A.  
724 Four of 6 pairs showed compatible results according to the production of mating  
725 filaments. (B) Mating result of 8 strains germinated from two teliospores:  
726 12JK1RB1\_A and 12SB1RB1\_B. Twelve pairs showed compatible mating. (C) Same  
727 process but different results with different strains. Strains were produced from  
728 teliospores 12SB1RB1\_A and 12SB1RB1\_B. Only 8 pairs showed compatible mating.  
729 (D) Mating assay of 6 *U. esculenta* isolates whose mating type were determined.  
730 Compatible and incompatible mating pairs were confirmed (1, 12JK1RB1-A1; 2,  
731 13PJ1GB1-A3; 3, 12SB1RB1-B4; 4, 13PJ1GB1-A4; 5, 12JK1RB1-A2; 6,  
732 13PJ3GB1-A1). Mating assay performed on PDA medium containing 1% charcoal,  
733 except for (D) performed on GMM medium.

734

735 **Figure 4** Genetic structure of mating type A region in *U. esculenta* (12JK1RB1-A1,  
736 12SB1RB1-B4, 12JK1RB1-A2) and related smut fungi. Three clusters of A-region  
737 genes were identified among *U. esculenta* isolates in Taiwan and showed  
738 conservation with related smut fungi. Several conserved genes, including *pra*  
739 (pheromone receptor), *mfa* (mating factor/pheromone), and *lga/rga* (mitochondria  
740 inheritance-related genes), were identified and were flanked by conserved *lba* and *rba*  
741 genes. Both Ue a2 and Sw a3 have one predicted gene, annotated as a predicted open

742 reading frame, which showed only partial similarity to other *lga* genes. (Uh, *U. hordei*;  
743 Ue, *U. esculenta*; Um, *U. maydis*; Sr, *Sporisorium reilianum*; Sw, *S. walker*; Usg,  
744 *Ustanciosporium gigantosporum*)

745 **Figure 5** Genetic structure of mating type B region in *U. esculenta* (12JK1RB1-A1,  
746 13PJ1GB1-A4, 12JK1RB1-A2) and related smut fungi. bWest (*bW*; blue arrow) and  
747 bEast (*bE*; green arrow) genes contained a homeodomain region (red block) and were  
748 flanked by the *nat1* and *cld1* genes (black arrows). Three clusters of mating type  
749 B-related genes were identified among *U. esculenta* isolates in Taiwan. Except for  
750 common *bE* and *bW* genes, transposons were also located in this region, comprising  
751 erminal inverted repeat (TIR) (orange block) and DDE domains (light gray). Ue b3  
752 had a large size and contained 5 different tandem repeats (arrow heads). Brown arrow  
753 indicates repeats with several single nucleotide polymorphisms and purple arrow  
754 indicates identical repeat. Identical number on the arrow indicates the same pair. The  
755 dashed white box in the b3 transposon represents the inserted region as compared to  
756 b1 and b2 transposons. *S. reilianum* b1 and b2 loci carry a similar DNA transposon as  
757 well. (Uh, *U. hordei*; Ue, *U. esculenta*; Um, *U. maydis*; Sr, *Sporisorium reilianum*)

758

759 **Figure 6** The alignments and phylogenetic analysis of *mfa* and *pra* genes. (A) Mfa  
760 protein sequence showed a conserved region of the CAAX motif and the sequence in  
761 yellow was mature pheromone protein. The protein weight matrix for alignment was  
762 point accepted mutation (PAM) and the gap penalty of both pairwise and multiple  
763 alignment was 5. (B) Phylogenetic analysis of *mfa* protein. (C) Phylogenetic analysis  
764 of *pra* protein. Both were analyzed by the neighbor-joining method and *mfa* and *pra*  
765 results were divided into 3 groups.

766

767 **Figure 7** Comparison of rga protein. (A) The phylogenetic tree of rga protein. Two  
768 Ue rga proteins were placed in 2 different clades. (B) Comparison of rga homology  
769 proteins: Ax, *Anthracoystis walker*; Me, *Macalpinomyces eriachnes*; Sc,  
770 *Sporisorium scitamineum*; Ux, *Ustilago xerochloae*; Usg, *Ustanciosporium*  
771 *gigantosporum*; Sw, *Sporisorium walker*. The phylogenetic analysis involved the  
772 neighbor-joining method, and the protein matrix for alignment was PAM.

773

774

775 **Figure 8** Syntenic comparison of mating-type chromosomes among *U. esculenta*, *U.*  
776 *maydis* and *U. hordei*. (A) Partial sequence of MAT locus in *U. esculenta* (UE) is  
777 syntenic with *U. maydis* chromosomes 5 and 1. (B) Comparison of the sequence of  
778 MAT locus between *U. esculenta* and *U. hordei* indicates that these two regions are  
779 not similar. *U. esculenta* MAT locus is more similar to that of *U. maydis* than  
780 chromosome 2 in *U. hordei*.

781

782 **Figure 9** Sequence comparison of *U. esculenta* mating type locus and corresponding  
783 region in *S. reilianum*. Green arrows represent mating type-related genes. Red and  
784 blue shades are aligned regions where the sequence identity was greater than 70%.  
785 Blue indicates inverted sequence. Alignment was by NCBI-blastn with default  
786 settings.

787

788 **Figure 10** Mating-type screening of *U. esculenta* by multiplex PCR. (A) Three  
789 isolates with different mating types were selected to validate the primers for a1/a2/a3  
790 and b1/b2/b3. M: 100 bp marker; Lane 1: PCR products of a1/a2/a3. The amplified  
791 fragments were designed in the *pra* genes and the sizes of amplicons were 457 bp for  
792 a1, 315 bp for a2 and 515 bp for a3. Lane 2: PCR products of b1/b2/b3. The amplified

793 fragments were designed in the *bE* genes and the sizes of amplicons are 347 bp for b1,  
794 237 bp for b2 and 477 bp for b3. (B) Multiplex PCR screening for mating type  
795 showed a2 and a3 mating types among 20 *U. esculenta* isolates. (C) Multiplex PCR  
796 screening of the same 20 strains for b mating type showed b2 and b3 mating type and  
797 no recombination.

798

799 **Figure S1** Pacbio reads mapping and assembly result. (A) The average read coverage  
800 of unitig\_12 where the mating type locus was located. The mean coverage of  
801 unitig\_12 was 81.15X. The coverage of the MAT locus was similar to other bases of  
802 unitig\_12. (B) Detailed read-mapping views of mating type locus. Region 1 to 4  
803 represents the regions of start, lowest coverage, and middle and end site, respectively.

804

805 **Figure S2** Sequence comparison of *U. esculenta* (UE) MAT on unitig\_12 and *U.*  
806 *hordei* (UH) MAT. Green box represents *U. esculenta* MAT with parts of the  
807 sequence showing synteny to UH chromosome 2. This region in UH is dense but is  
808 scattered in UE. The quantity of the repetitive sequence is shared between sex  
809 chromosomes.

810



## Figure

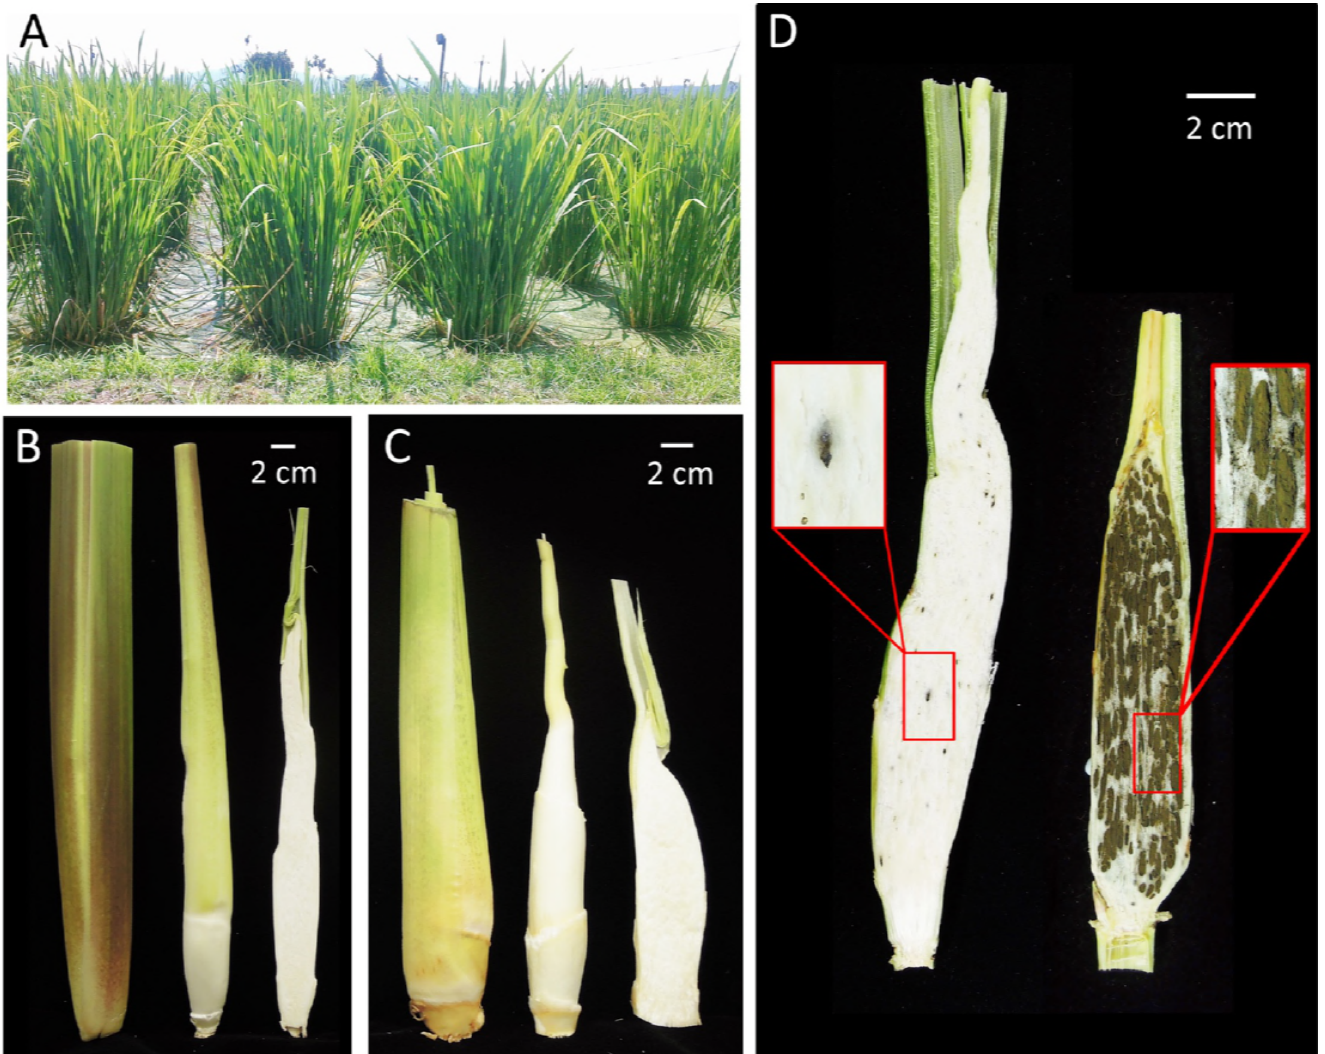

Figure 1

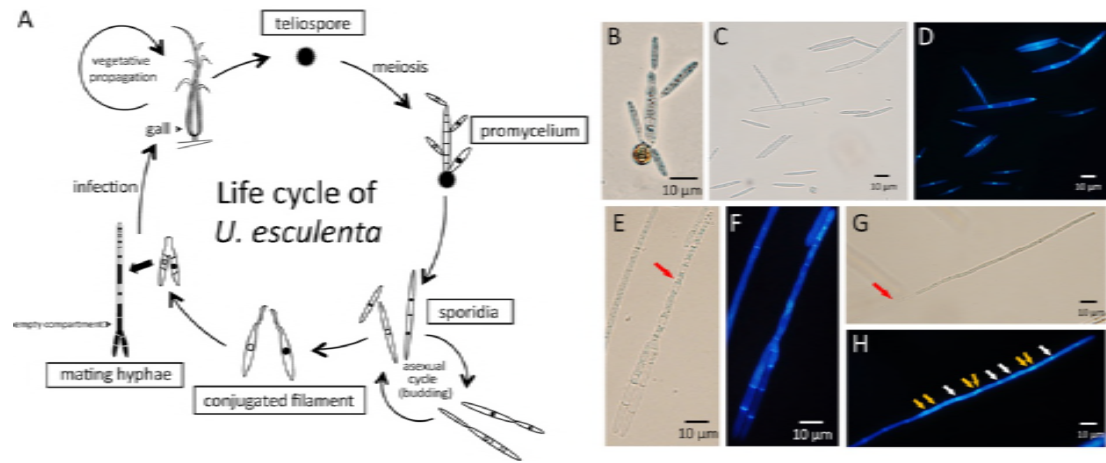

Figure 2

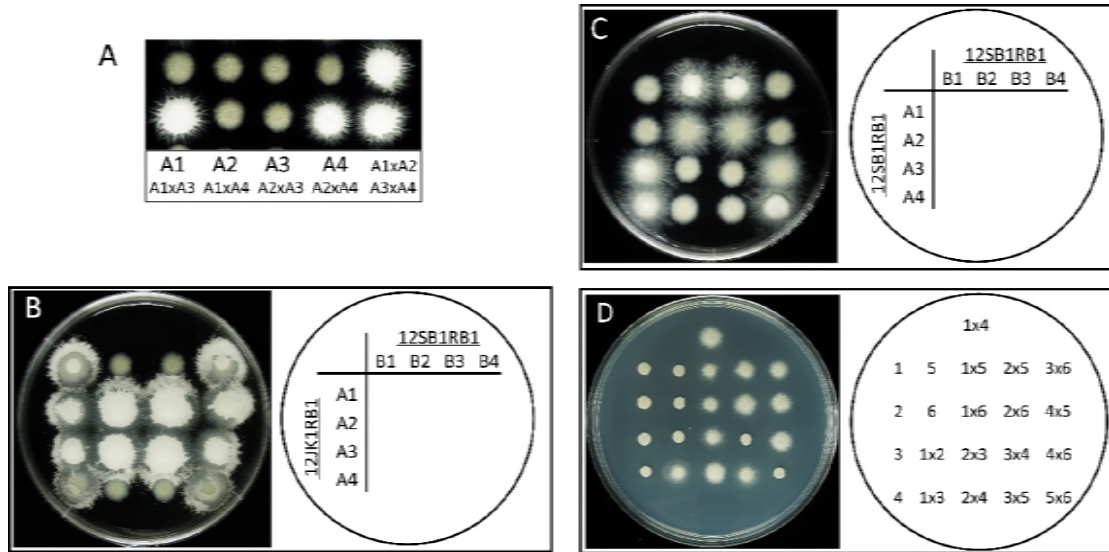

Figure 3

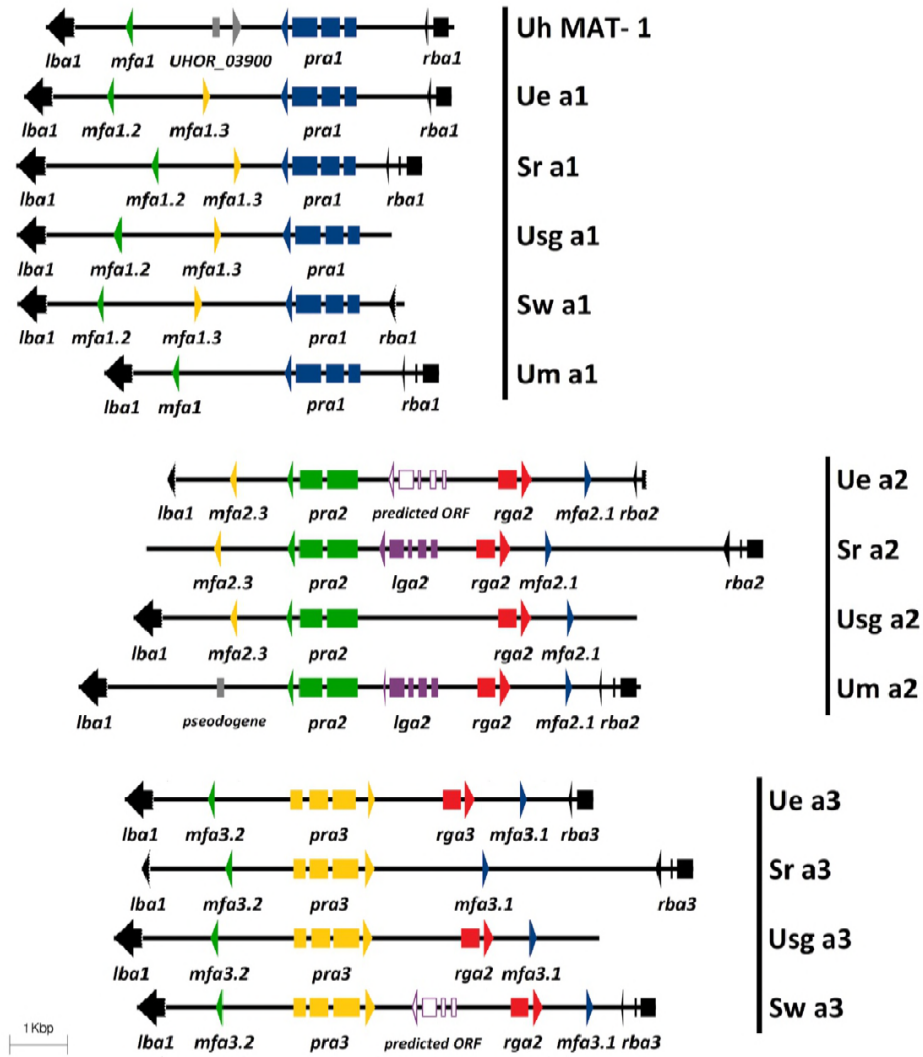

Figure 4

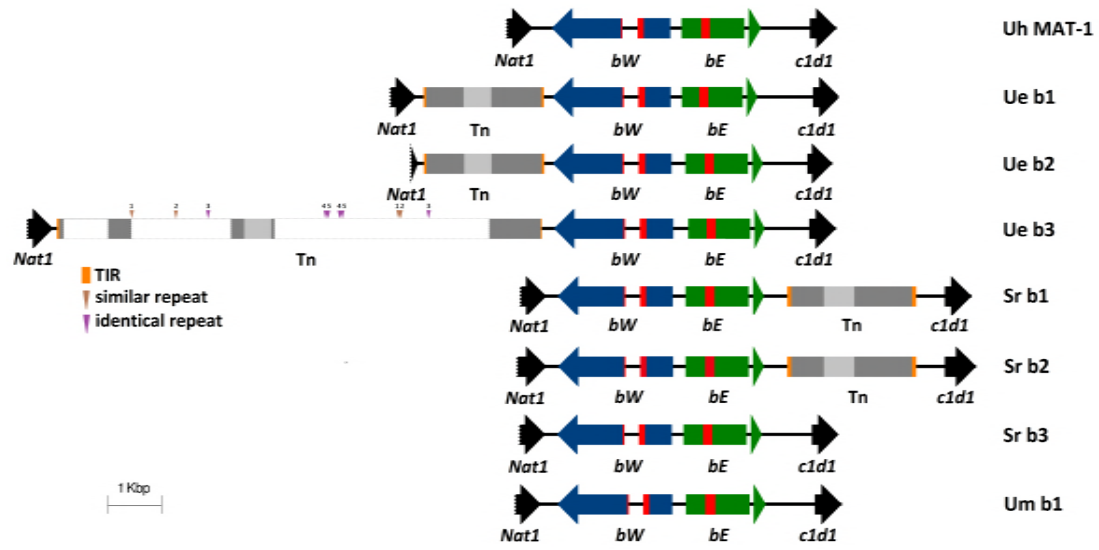

Figure 5

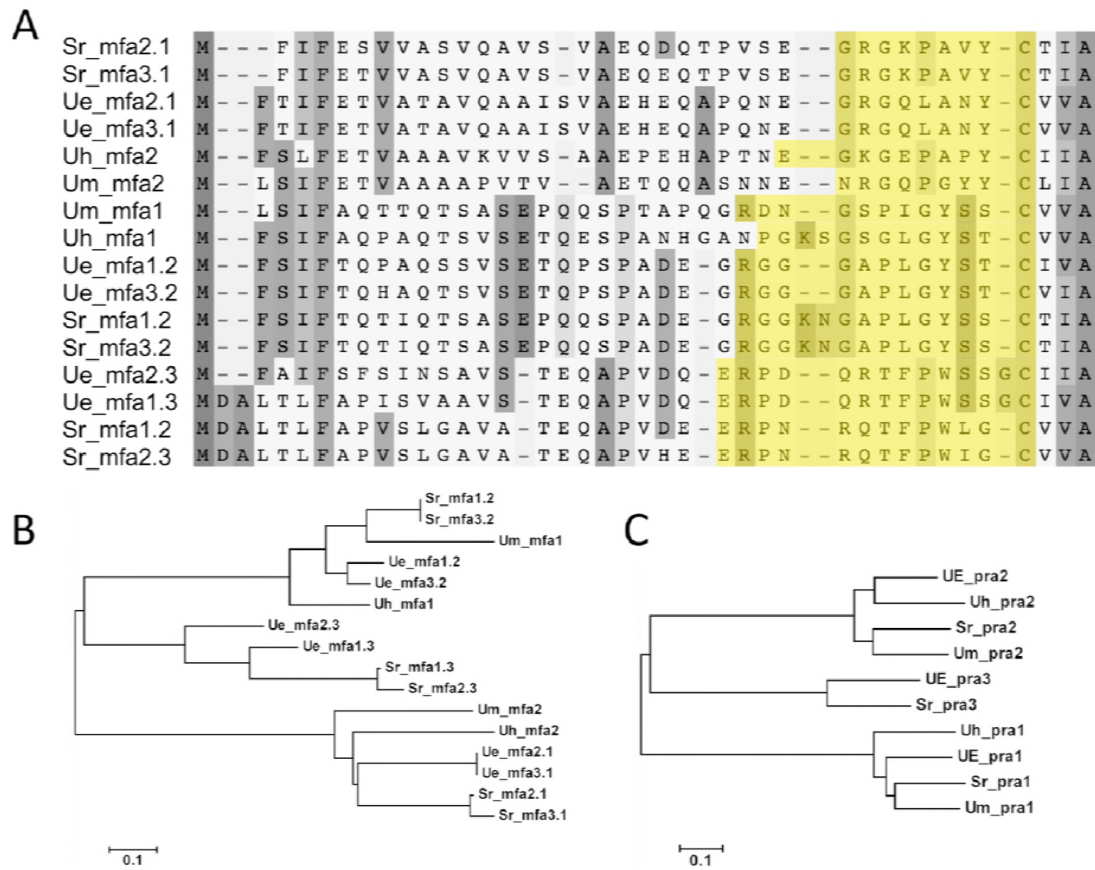

Figure 6

A

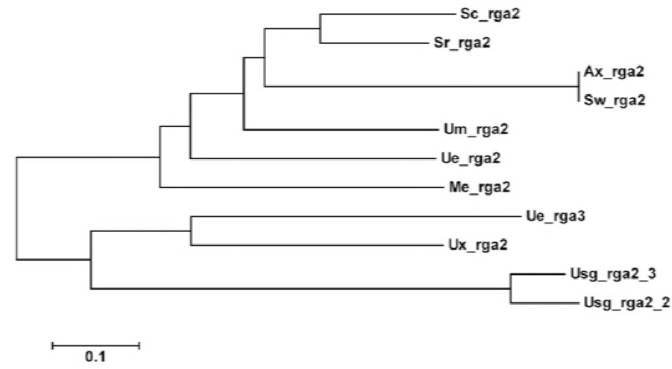

B

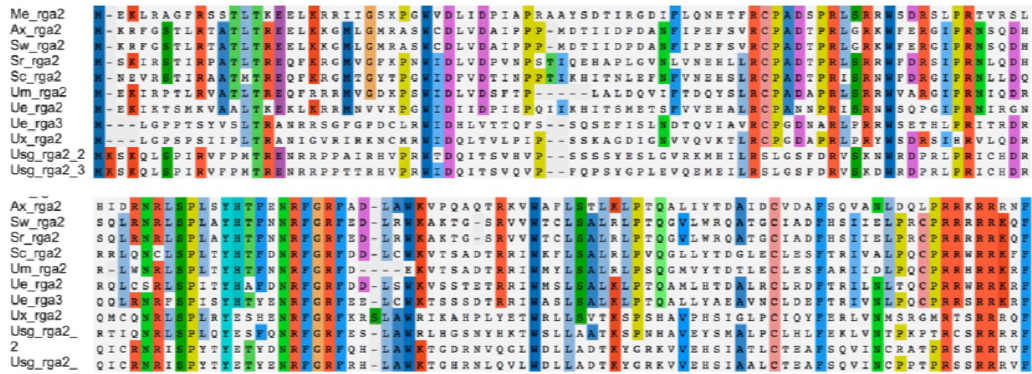

Figure 7

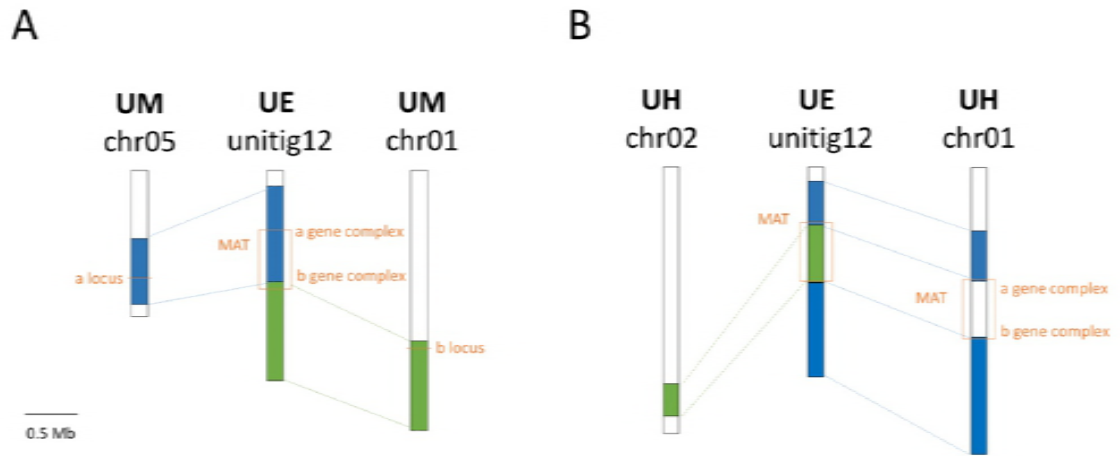

Figure 8



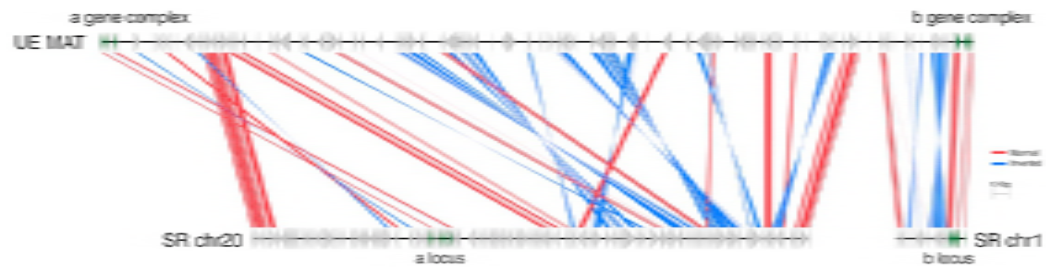

Figure 9

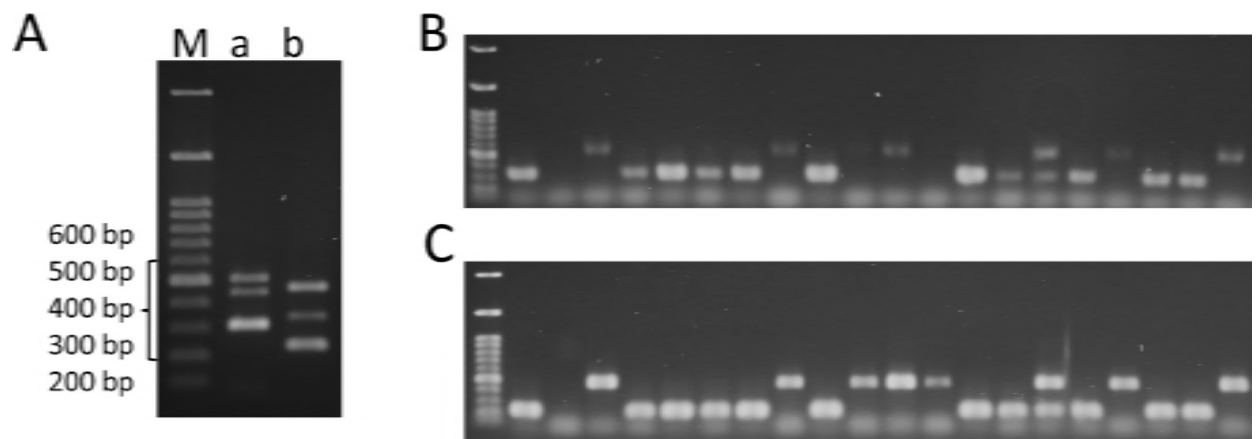

Figure 10

## Supplemental data

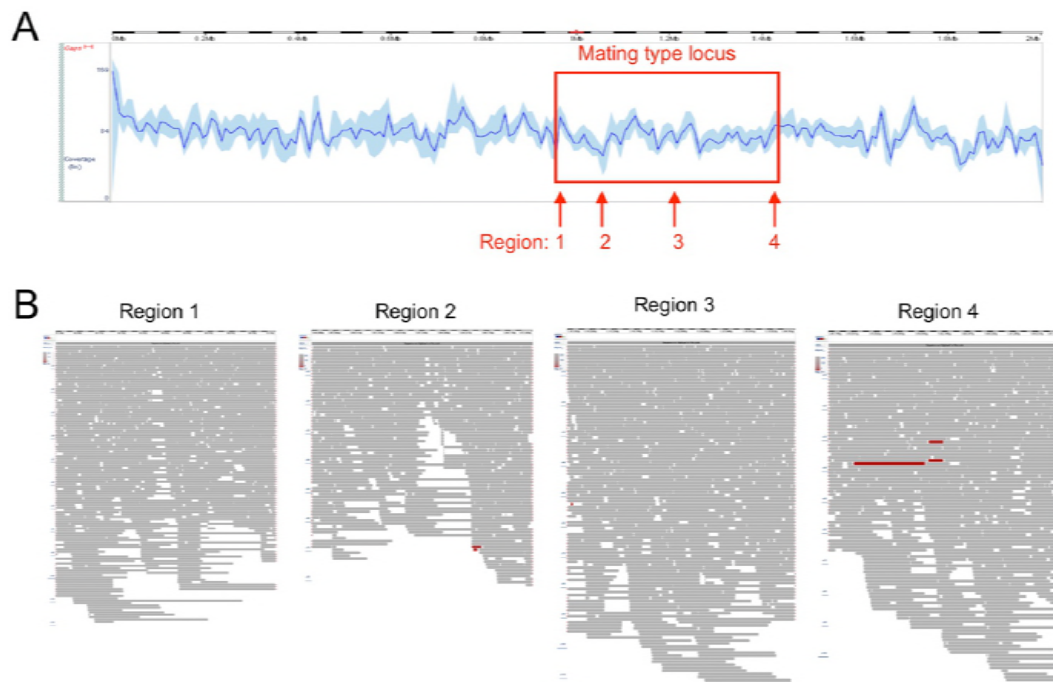

Figure S1

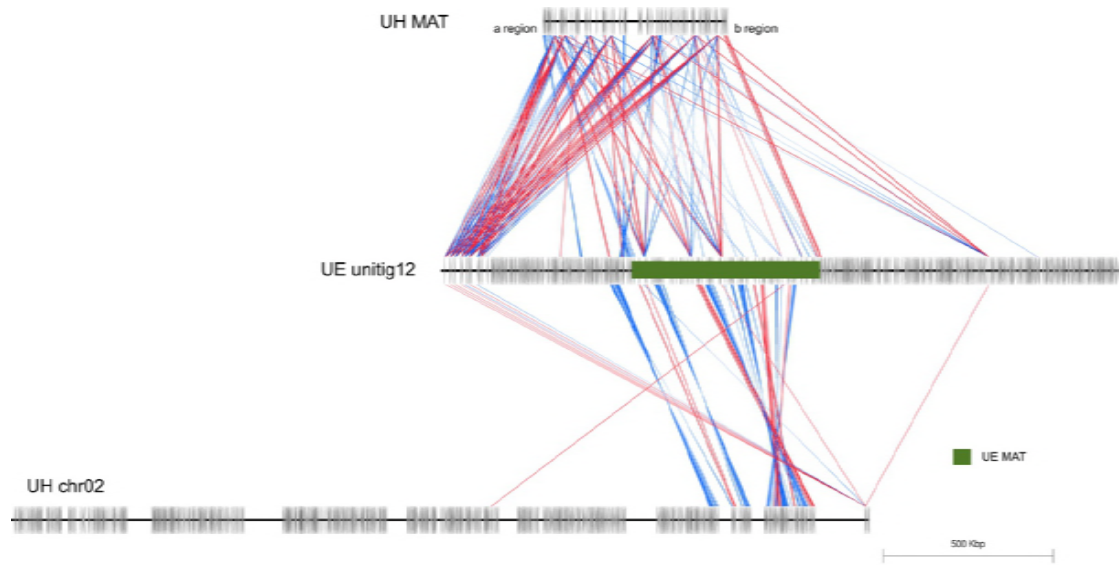

Figure S2

**Table 1 Mating assay of inter- and intra-crossing of 6 sets of teliospore-derived strains**

| Teliospore  |    | 12SB1RB1     |              |              |              | 12JK1RB1     |              |              |              | 12SB1RB1     |              |              |              | 13PJ1GB1     |              |              |              | 13PJ3GB1     |              |              |              | 13PS2GB1     |              |              |              |
|-------------|----|--------------|--------------|--------------|--------------|--------------|--------------|--------------|--------------|--------------|--------------|--------------|--------------|--------------|--------------|--------------|--------------|--------------|--------------|--------------|--------------|--------------|--------------|--------------|--------------|
| Strain No.  |    | A1           | A2           | A3           | A4           | A1           | A2           | A3           | A4           | B1           | B2           | B3           | B4           | A1           | A2           | A3           | A4           | A1           | A2           | A3           | A4           | A1           | A2           | A3           | A4           |
| Mating Type |    | <i>MAT-2</i> | <i>MAT-2</i> | <i>MAT-1</i> | <i>MAT-1</i> | <i>MAT-1</i> | <i>MAT-3</i> | <i>MAT-3</i> | <i>MAT-1</i> | <i>MAT-2</i> | <i>MAT-1</i> | <i>MAT-1</i> | <i>MAT-2</i> | <i>MAT-2</i> | <i>MAT-1</i> | <i>MAT-1</i> | <i>MAT-2</i> | <i>MAT-3</i> | <i>MAT-1</i> | <i>MAT-1</i> | <i>MAT-3</i> | <i>MAT-3</i> | <i>MAT-2</i> | <i>MAT-3</i> | <i>MAT-2</i> |
| 12SB1RB1    | A1 | <i>MAT-2</i> | -            | +            | +            | +            | +            | +            | +            | -            | +            | +            | -            |              |              |              |              | +            | +            | +            | +            |              |              |              |              |
|             | A2 | <i>MAT-2</i> |              | +            | +            | +            | +            | +            | +            | -            | +            | +            | -            |              |              |              |              | +            | +            | +            | +            |              |              |              |              |
|             | A3 | <i>MAT-1</i> |              |              | -            | -            | +            | +            | -            | +            | -            | -            | +            |              |              |              |              | +            | -            | -            | +            |              |              |              |              |
|             | A4 | <i>MAT-1</i> |              |              |              | -            | +            | +            | -            | +            | -            | -            | +            |              |              |              |              | +            | -            | -            | +            |              |              |              |              |
| 12JK1RB1    | A1 | <i>MAT-1</i> |              |              |              | +            | +            | -            |              | +            | -            | -            | +            |              |              |              |              | +            | -            | -            | +            |              |              |              |              |
|             | A2 | <i>MAT-3</i> |              |              |              |              | -            | +            |              | +            | +            | +            | +            |              |              |              |              | -            | +            | +            | -            |              |              |              |              |
|             | A3 | <i>MAT-3</i> |              |              |              |              |              | +            |              | +            | +            | +            | +            |              |              |              |              | -            | +            | +            | -            |              |              |              |              |
|             | A4 | <i>MAT-1</i> |              |              |              |              |              |              |              | +            | -            | -            | +            |              |              |              |              | +            | -            | -            | +            |              |              |              |              |
| 12SB1RB1    | B1 | <i>MAT-2</i> |              |              |              |              |              |              |              |              | +            | +            | -            |              |              |              |              |              |              |              |              |              |              |              |              |
|             | B2 | <i>MAT-1</i> |              |              |              |              |              |              |              |              |              |              | +            |              |              |              |              |              |              |              |              |              |              |              |              |
|             | B3 | <i>MAT-1</i> |              |              |              |              |              |              |              |              |              |              | -            |              |              |              |              |              |              |              |              |              |              |              |              |
|             | B4 | <i>MAT-2</i> |              |              |              |              |              |              |              |              |              |              |              |              |              |              |              |              |              |              |              |              |              |              |              |
| 13PJ1GB1    | A1 | <i>MAT-2</i> |              |              |              |              |              |              |              |              |              |              |              | +            | +            | -            |              | +            | +            | +            | +            | +            | -            | +            | -            |
|             | A2 | <i>MAT-1</i> |              |              |              |              |              |              |              |              |              |              |              |              | -            | +            |              | +            | -            | -            | +            | +            | +            | +            | +            |
|             | A3 | <i>MAT-1</i> |              |              |              |              |              |              |              |              |              |              |              |              |              | +            |              | +            | -            | -            | +            | +            | +            | +            | +            |
|             | A4 | <i>MAT-2</i> |              |              |              |              |              |              |              |              |              |              |              |              |              |              | +            | +            | +            | +            | +            | +            | -            | +            | -            |
| 13PJ3GB1    | A1 | <i>MAT-3</i> |              |              |              |              |              |              |              |              |              |              |              |              |              |              |              | +            | +            | -            |              | -            | +            | -            | +            |
|             | A2 | <i>MAT-1</i> |              |              |              |              |              |              |              |              |              |              |              |              |              |              |              |              |              | +            |              | +            | +            | +            | +            |
|             | A3 | <i>MAT-1</i> |              |              |              |              |              |              |              |              |              |              |              |              |              |              |              |              |              |              | +            | +            | +            | +            | +            |
|             | A4 | <i>MAT-3</i> |              |              |              |              |              |              |              |              |              |              |              |              |              |              |              |              |              |              |              | -            | +            | -            | +            |
| 13PS2GB1    | A1 | <i>MAT-3</i> |              |              |              |              |              |              |              |              |              |              |              |              |              |              |              |              |              |              |              |              | +            | -            | +            |
|             | A2 | <i>MAT-2</i> |              |              |              |              |              |              |              |              |              |              |              |              |              |              |              |              |              |              |              |              |              | +            | -            |
|             | A3 | <i>MAT-3</i> |              |              |              |              |              |              |              |              |              |              |              |              |              |              |              |              |              |              |              |              |              |              | +            |
|             | A4 | <i>MAT-2</i> |              |              |              |              |              |              |              |              |              |              |              |              |              |              |              |              |              |              |              |              |              |              | +            |

+: compatible crossing; -: incompatible crossing

**Table 2 Mating type screening of sexual progenies from the teliospores of two independent inoculated plants**

| Idiomorph    | 13PJ3GB1-A2 × 13PJ3GB1-A4 |            |                 |            | 13PS2GB1-A3 × 13PS2GB1-A4 |            |
|--------------|---------------------------|------------|-----------------|------------|---------------------------|------------|
|              | (a1b1)                    |            | (a2b2)          |            | (a2b2)                    | (a3b3)     |
|              | Micromanipulator          |            | Spreading Plate |            | Spreading Plate           |            |
|              | Number                    | Percentage | Number          | Percentage | Number                    | Percentage |
| a1b1         |                           |            |                 |            | 12                        | 57%        |
| a2b2         | 29                        | 50%        | 234             | 57%        |                           |            |
| a3b3         | 29                        | 50%        | 174             | 43%        | 9                         | 43%        |
| <b>total</b> | <b>58</b>                 |            | <b>408</b>      |            | <b>21</b>                 |            |

**Table S1 Collections of water bamboo in Taiwan**

| Location | Cultivar                 | Stem type | Collection |
|----------|--------------------------|-----------|------------|
| Sanzhi   | red shell                | heishin   | 12SB1RB    |
| Sanzhi   | red shell                | huashin   | 12SB1RF    |
| Sanzhi   | red shell                | heishin   | 12SF1RB    |
| Sanzhi   | red shell                | heishin   | 12SP1RB    |
| Sanzhi   | red shell                | heishin   | 12ST1RB    |
| Sanzhi   | red shell                | heishin   | 13S1RB     |
| Sanzhi   | red shell                | huashin   | 13S1RF     |
| Sanzhi   | red shell                | huashin   | 13S2RF     |
| Sanzhi   | red shell                | huashin   | 13S3RF     |
| Sanzhi   | red shell                | heishin   | 13SS1REB   |
| Sanzhi   | red shell                | huashin   | 13SS1REF   |
| Sanzhi   | red shell                | Baishin   | 13SS1REW   |
| Sanzhi   | red shell                | heishin   | 13SS2RIB   |
| Sanzhi   | red shell                | huashin   | 13SS2RIF   |
| Sanzhi   | red shell                | heishin   | 13SS3RLB   |
| Sanzhi   | red shell                | huashin   | 13SS3RLF   |
| Sanzhi   | green shell              | heishin   | 13SS4GEB   |
| Sanzhi   | green shell              | huashin   | 13SS4GEF   |
| Sanzhi   | green shell              | heishin   | 13SS5GLB   |
| Sanzhi   | green shell              | huashin   | 13SS5GLF   |
| Jinshan  | red shell                | heishin   | 12JK1RB    |
| Jinshan  | red shell                | heishin   | 12JM1RB    |
| Jinshan  | red shell                | huashin   | 12JY1RF    |
| Jinshan  | red shell                | heishin   | 12JW1RB    |
| Jinshan  | red shell                | heishin   | 12JT1RB    |
| Taoyuan  | Taoyuan No.1 (red shell) | huashin   | 13TO1R1F   |
| Taoyuan  | Taoyuan No.1 (red shell) | heishin   | 13TN1R1B   |
| Taoyuan  | Taoyuan No.1 (red shell) | heishin   | 13TD1R1B   |
| Taoyuan  | Taoyuan No.2 (red shell) | heishin   | 13TO1R2B   |
| Taoyuan  | Taoyuan No.2 (red shell) | heishin   | 13TN1R2B   |
| Taoyuan  | Taoyuan No.2 (red shell) | heishin   | 13TD1R2B   |
| Puli     | green shell              | heishin   | 13PJ1GB    |
| Puli     | green shell              | heishin   | 13PJ2GB    |
| Puli     | green shell              | heishin   | 13PJ3GB    |
| Puli     | green shell              | heishin   | 13PJ4GB    |
| Puli     | green shell              | heishin   | 13PJ5GB    |
| Puli     | green shell              | heishin   | 13PJ6GB    |
| Puli     | green shell              | heishin   | 13PS1GB    |
| Puli     | green shell              | heishin   | 13PS2GB    |
| Puli     | green shell              | heishin   | 13PS3GB    |

**Table S2 Strains isolated from germinated teliospores of *U. esculenta***

| Location     | Cultivar        | Collection | Stem type    | Isolate (mating type) |              |              |              |              |              |              |         |
|--------------|-----------------|------------|--------------|-----------------------|--------------|--------------|--------------|--------------|--------------|--------------|---------|
| Sanzhi       | red shell       | 12SB1RB    | Heishin      | 12SB1RB1-A1*          | (MAT-2)      | 12SB1RB1-A2* | (MAT-2)      | 12SB1RB1-A3* | (MAT-1)      | 12SB1RB1-A4* | (MAT-1) |
|              |                 |            |              | 12SB1RB1-B1           | (MAT-2)      | 12SB1RB1-B2  | (MAT-1)      | 12SB1RB1-B3  | (MAT-1)      | 12SB1RB1-B4  | (MAT-2) |
|              | early red shell | 13SS1REB1  | Heishin      | 13SS1REB1-B1          | (MAT-2)      | 13SS1REB1-B2 | (MAT-2)      | 13SS1REB1-B3 | (MAT-2)      | 13SS1REB1-B4 | (MAT-1) |
|              |                 |            |              | 13SS2REB2             | (MAT-1)      | 13SS1REB2-A3 | (MAT-2)      | 13SS1REB2-B1 | (MAT-2)      | 13SS1REB2-B2 | (MAT-1) |
|              | green shell     | 13SS4GEB   | Heishin      | 13SS4GEB1-A2          | (MAT-2)      | 13SS4GEB1-A3 | (MAT-2)      | 13SS4GEB1-B4 | (MAT-1)      |              |         |
| Jinshan      | red shell       | 12JK1RB    | Heishin      | 12JK1RB1-A1           | (MAT-1)      | 12JK1RB1-A2  | (MAT-3)      | 12JK1RB1-A3  | (MAT-3)      | 12JK1RB1-A4  | (MAT-1) |
| Puli         | green shell     | 13PJ1GB    | Heishin      | 13PJ1GB1-A1           | (MAT-2)      | 13PJ1GB1-A2  | (MAT-1)      | 13PJ1GB1-A3  | (MAT-1)      | 13PJ1GB1-A4  | (MAT-2) |
|              |                 | 13PJ3GB    |              | 13PJ3GB1-A1           | (MAT-3)      | 13PJ3GB1-A2  | (MAT-1)      | 13PJ3GB1-A3  | (MAT-1)      | 13PJ3GB1-A4  | (MAT-3) |
|              |                 | 13PS2GB    |              | 13PS2GB1-A1           | (MAT-3)      | 13PS2GB1-A2  | (MAT-2)      | 13PS2GB1-A3  | (MAT-3)      | 13PS2GB1-A4  | (MAT-2) |
| Taoyuan      | Taoyuan No.1    | 13TN1R1B   | Heishin      | 13TN1R1B1-A1          | (MAT-3)      | 13TN1R1B1-A2 | (MAT-2)      | 13TN1R1B1-A3 | (MAT-3)      | 13TN1R1B1-A4 | (MAT-2) |
|              |                 |            |              | 13TN1R1B1-B1          |              | 13TN1R1B1-B2 |              |              |              |              |         |
|              |                 |            |              | 13TN1R1B1-C1          | (MAT-3)      | 13TN1R1B1-C2 |              | 13TN1R1B1-C3 | (MAT-3)      |              |         |
|              |                 |            | 13TN1R1B1-D1 | (MAT-3)               | 13TN1R1B1-D2 | (MAT-2)      | 13TN1R1B1-D3 | (MAT-3)      |              |              |         |
|              | Taoyuan No.2    | 13TO1R2B   | Heishin      | 13TO1R2B1-A1          | (MAT-1)      | 13TO1R2B1-A2 | (MAT-2)      | 13TO1R2B1-A3 | (MAT-1)      | 13TO1R2B1-A4 | (MAT-2) |
|              |                 |            |              | 13TO1R2B1-B1          | (MAT-2)      | 13TO1R2B1-B2 | (MAT-1)      | 13TO1R2B1-B3 | (MAT-2)      | 13TO1R2B1-B4 | (MAT-1) |
| 13TO1R2B1-C1 |                 |            |              | (MAT-2)               | 13TO1R2B1-C2 | (MAT-2)      | 13TO1R2B1-C3 | (MAT-2)      | 13TO1R2B1-C4 |              |         |

\*A1, A2, A3, A4 indicate the 4 sporidia isolated from the same teliospore; B1, B2, B3, B4 are derived from the same teliospore.



**Table S3 Strains isolated from stem tissue of water bamboo**

| Location | Cultivar         | Collection | Stem type | Isolate         |                 |                 |                 |                 |                 |
|----------|------------------|------------|-----------|-----------------|-----------------|-----------------|-----------------|-----------------|-----------------|
| Sanzhi   | late green shell | 13SS2GLF   | Huashin   | 13SS2GLF1-6-1   | 13SS2GLF1-6-2   | 13SS2GLF1-6-3   | 13SS2GLF1-6-4   | 13SS2GLF1-7-4   |                 |
|          |                  | 13SS1REW   | Baishin   | 13SS1REW1-3-1-1 | 13SS1REW1-3-1-2 | 13SS1REW1-3-1-3 | 13SS1REW1-3-1-4 |                 |                 |
|          |                  |            |           | 13SS1REW1-4-1   | 13SS1REW1-4-2   | 13SS1REW1-4-3   | 13SS1REW1-4-4   |                 |                 |
|          |                  | 13SS1REF1  |           | 13SS1REF1-3-1   | 13SS1REF1-3-2   | 13SS1REF1-3-3   | 13SS1REF1-3-4   | 13SS1REF1-9-3   | 13SS1REF1-9-4   |
| Sanzhi   | early red shell  |            |           | 13SS1REF2-1-1   | 13SS1REF2-1-2   | 13SS1REF2-1-3   | 13SS1REF2-1-4   | 13SS1REF2-3-1-1 | 13SS1REF2-3-1-2 |
|          |                  | 13SS1REF2  | Huashin   | 13SS1REF2-3-1-3 | 13SS1REF2-3-1-4 | 13SS1REF2-3-2-2 | 13SS1REF2-3-2-4 | 13SS1REF2-4-1   | 13SS1REF2-4-2   |
|          |                  |            |           | 13SS1REF2-4-3   | 13SS1REF2-4-4   | 13SS1REF2-8-1   | 13SS1REF2-8-2   | 13SS1REF2-8-3   | 13SS1REF2-8-4   |
|          |                  | 13SS1REF3  |           | 13SS1REF3-1-1   | 13SS1REF3-1-2   | 13SS1REF3-1-3   | 13SS1REF3-1-4   |                 |                 |
|          |                  |            |           | 13SS1RF1-1-1    | 13SS1RF1-1-2    | 13SS1RF1-1-3    | 13SS1RF1-1-4    | 13SS1RF1-2-1    | 13SS1RF1-2-2    |
|          |                  | 13SS1RF1   |           | 13SS1RF1-2-3    | 13SS1RF1-2-4    | 13SS1RF1-7-1    | 13SS1RF1-7-2    | 13SS1RF1-7-4    | 13SS1RF1-9-1    |
|          |                  |            | Huashin   | 13SS1RF1-9-2    | 13SS1RF1-9-3    | 13SS1RF1-9-4    |                 |                 |                 |
|          |                  | 13SS1RF2   |           | 13SS1RF2-10-1   | 13SS1RF2-10-2   | 13SS1RF2-10-3   | 13SS1RF2-10-4   |                 |                 |
|          |                  |            |           | 13SS1RF3-4-1    | 13SS1RF3-4-2    | 13SS1RF3-4-3    | 13SS1RF3-4-4    | 13SS1RF3-7-1    | 13SS1RF3-7-2    |
| Sanzhi   | red shell        | 13SS1RF3   |           | 13SS1RF3-7-3    | 13SS1RF3-7-4    | 13SS1RF3-10-2   | 13SS1RF3-10-3   | 13SS1RF3-10-4   |                 |
|          |                  |            |           | 13SS1RB1-1-1    | 13SS1RB1-1-2    | 13SS1RB1-1-4    | 13SS1RB1-6-1    | 13SS1RB1-6-2    | 13SS1RB1-6-3    |
|          |                  | 13SS1RB    | Heishin   | 13SS1RB1-6-4    | 13SS1RB1-7-1    | 13SS1RB1-7-2    | 13SS1RB1-7-3    | 13SS1RB1-7-4    | 13SS1RB1-9-1    |
|          |                  |            |           | 13SS1RB1-9-2    | 13SS1RB1-9-3    | 13SS1RB1-9-4    | 13SS1RB1-10-1   | 13SS1RB1-10-2   | 13SS1RB1-10-3   |
|          |                  |            |           | 13SS1RB1-10-4   |                 |                 |                 |                 |                 |

**Table S4 Primer sets of mating type A and B gene complex**

| A gene complex |                          |             |                       |
|----------------|--------------------------|-------------|-----------------------|
| Primer         | Sequence (5'→3')         | Gene        | Mating type idiomorph |
| wc1476         | CAGCGCAARAAAYCCCAACGG    | <i>lba1</i> |                       |
| wc1477         | GCATACATVGGAAATCTCCCAGA  | <i>lba1</i> |                       |
| wc1478         | TTYGTCGCNACYATGGGCGC     | <i>panC</i> |                       |
| wc1479         | CCTTCCATCTGRTGRCTGAG     | <i>panC</i> |                       |
| wc1532         | CCTTTCATTGCTCGCCAGTG     | <i>pra1</i> | a1                    |
| wc1533         | AGAGGGCAGACGAGTCGAGAC    | <i>pra1</i> | a1                    |
| wc1540         | GGTCGACAGCCATCATTGAG     | <i>lba1</i> | a1, a2, a3            |
| wc1541         | GCCCTTGGATGTCTCTAGCG     | <i>rba1</i> | a1, a2, a3            |
| wc1542         | CCGTCCCCTGAGGCATCAAC     | <i>pra3</i> | a3                    |
| wc1543         | ACGTTCTGAACGCTCCTTGT     |             | a3                    |
| wc1545         | ACGGCGTCAAGTTGGCATTAC    |             | a1                    |
| wc1546         | AGTGAACCGAGCACCTCAATGC   | <i>pra1</i> | a1                    |
| wc1547         | ATCATGTATCTTGGAGCCCTGTC  | <i>pra3</i> | a3                    |
| wc1548         | GACCTGCGTGTCTGTTCAAGC    | <i>rga3</i> | a3                    |
| wc1629         | GCCTCAACAACCGATGCAATG    |             | a2, a3                |
| wc1630         | ATCAACGATCCGTCCACCCATC   |             | a2, a3                |
| wc1644         | GGAACACACAATGCTGCAGAATAA |             | a2                    |
| wc1645         | GAGTCCTTGTACTTGCATTGTG   |             | a2                    |
| wc1677         | CACCTCTGAATCTTCCAAATCG   | <i>rga3</i> | a3                    |
| wc1678         | AGCGGTTCTCGTATGTATGGTA   | <i>rga2</i> | a2                    |
| wc1679         | CAAAGACGGAGCACAGGACG     | <i>pra2</i> | a2                    |
| wc1701         | GAAAAGAGGTAGGGTTCCA      |             | a1                    |
| wc1702         | GTA CTG ACCATCAGATAAAG   |             | a1                    |
| wc1703         | GACTTTGAACCCTCTTG TAC    |             | a1                    |
| wc1704         | GGTTTCCTTCGAGTTGTCTT     |             | a1                    |
| wc1705         | CCTGAACGTAATTCTGAGTC     |             | a1                    |
| wc1709         | CGGTGTCCAAGCCCCAAGAC     |             | a2                    |
| wc1710         | AGAGCGGACAGAGATGAAAT     |             | a2                    |
| wc1721         | CAGAAAGACCGGATGCATACTC   |             | a2                    |
| wc1722         | TTTGGTTGCGACATCAGCG      | <i>pra2</i> | a2                    |
| wc1748         | GGTCTACAAGACAACGTCGTCA   | <i>pra2</i> | a2                    |
| wc1749         | AACTGGTCTGCTCCCTTATTCG   | <i>pra2</i> | a2                    |
| wc1750         | GATGCCCTTGGTTGATGACTG    | <i>pra3</i> | a3                    |
| wc1751         | GTTGTCCTCATATCCCTTTCG    | <i>pra1</i> | a1                    |
| wc1754         | ATCTCCATCGTGACA ACTAGGG  |             | a2                    |
| wc1755         | GCCTTGAATCGGTCGTAGCT     |             | a2                    |
| wc1756         | AAGCCCGAACATTGCGAAG      | <i>pra1</i> | a1                    |
| wc1762         | TCCCCATCACGGTGCTCTCA     | <i>pra3</i> | a3                    |
| wc2000         | TGTCACAGCTTCAAATCCAACC   |             | a2                    |
| wc2090         | GCGTGCGTGTCCCAAATCCTTC   |             | a2                    |

|                |                          |             |            |
|----------------|--------------------------|-------------|------------|
| wc2348         | CCGGCTAAGATAGCGTTTGTG    |             | a1         |
| wc2349         | GGGAGCAGAAGCAATGGACG     | <i>panC</i> | a1         |
| B gene complex |                          |             |            |
| wc1459         | CGCTCTGGTTCATCAACG       | <i>bE4</i>  |            |
| wc1460         | TGCTGTGCGATGGAAGGTGT     | <i>bE8</i>  |            |
| wc1461         | CRCTVTGGTTCATYAACG       | <i>bE4</i>  |            |
| wc1462         | YGCTGTCVATVGAAGGTG       | <i>bE8</i>  |            |
| wc1474         | CTGGTTCATCAACGCGCGCCGC   | <i>bE</i>   | b1, b3     |
| wc1475         | TGTCGATGGAAGGTGTCTTGCT   | <i>bE</i>   | b1, b2, b3 |
| wc1481         | TGGAYCTMGTKTGATWCTGCT    | <i>cll1</i> | b1, b2, b3 |
| wc1482         | CATWGCHGGDCGCTTCKTCTTG   | <i>cll1</i> | b1, b2, b3 |
| wc1483         | GTSATGCGGAYATYCCGGATAG   | <i>Nat1</i> | b1, b2, b3 |
| wc1484         | GTAGTGCTGSGCGAGGTAGTAGA  | <i>Nat1</i> | b1, b2, b3 |
| wc1511         | CTAAGCGTCTCACTCTGATCCAC  | <i>Nat1</i> | b1, b2, b3 |
| wc1512         | CTCTACAATTTCACCTCCGTTTC  | <i>cll1</i> | b1, b2, b3 |
| wc1523         | GTTGGTAGCAACCACTGAACTTTG | <i>bW1</i>  | b1         |
| wc1524         | CATCACTGTGGTCTCGGAAG     | <i>bE1</i>  | b1         |
| wc1525         | CCTGATAGTGAGGACTGTAAG    |             | b1         |
| wc1526         | GCATCCCAACTGAGTGCATGTAAC |             | b1         |
| wc1527         | AACAAGTGCATAGAGAGACCAA   |             | b3         |
| wc1528         | GCATAGATTCTGCTCTTTGTTCT  |             | b3         |
| wc1529         | CAGCTTGCCTGATATTGGGTGA   | <i>bW</i>   | b1, b3     |
| wc1530         | AAGACGACTGGGCAAGTATGATC  | <i>bE</i>   | b1, b2, b3 |
| wc1531         | CGTGTGCGCTTCAGGCACTGAGA  | <i>bE</i>   | b1, b2, b3 |
| wc1544         | CTACAAGGAGCACGAATCCAGGGC |             | b1, b2, b3 |
| wc1631         | TTGACTCAAAGGCAAGGAACGTA  | <i>Nat1</i> | b1, b2, b3 |
| wc1632         | CTGGAAGGCTGCGTAGGAACGTC  | <i>bW</i>   | b1, b2     |
| wc1633         | CTCAGCCTTCGCCCTCACCTCGT  | <i>bW2</i>  | b2         |
| wc1635         | CAACAATCTTGAAATCGCGCC    |             | b2         |
| wc1646         | GGTTCATGTTTGGTCAAGGTG    | DDE domain  | b1, b2     |
| wc1647         | GGCCAAAATTGACACATCCA     | DDE domain  | b1, b2     |
| wc1676         | GTTCTGATGCACCATCCCTCC    |             | b1, b2     |
| wc1697         | GTCACAGCGCCATTAGTC       |             | b2, b3     |
| wc1703         | GACCCTGTTGCAGATGTTCA     |             | b2         |
| wc1706         | GACCCTGTTGCAGATGTTCA     |             | b1         |
| wc1707         | TAGTAACAGTAGGCATCTCG     | <i>bW</i>   | b1, b3     |
| wc1708         | ATGACACAGGGGTTTAAGTG     |             | b1         |
| wc1723         | TGAGCATGGTACAGTCATTTGG   |             | b1, b2     |
| wc1742         | CGATCATTGCACGGAACCTT     | <i>bE</i>   | b1, b2, b3 |
| wc1743         | CCATGAACTGTCAGAAACAC     | <i>bE</i>   | b2         |
| wc1744         | CAGCCCGGACCTTGTACAGA     | <i>bE</i>   | b3         |
| wc1745         | TAAGCTGTTTGTGTCGGAA      | <i>bE</i>   | b1         |
| wc1746         | AACAGCCGCTTCTTGCATAG     | <i>bE</i>   | b2         |

|        |                          |           |            |
|--------|--------------------------|-----------|------------|
| wc1747 | GTCTTTCCTGTCGGCATGG      | <i>bE</i> | b3         |
| wc1934 | ATGAGCTCTGGTCTGCCCCGGTCA |           | b3         |
| wc1958 | GGGTCTTGAGAAGTATGGAGCA   |           | b3         |
| wc1959 | GCAGTGGTGGCAAACAACATTCC  |           | b3         |
| wc1960 | GCAACATCAGGTCAGCACCATCA  |           | b3         |
| wc1961 | GACCCTGCGACACCTACATCACA  |           | b3         |
| wc1962 | GGGCACCTTGTCACATGTGA     |           | b3         |
| wc1963 | TTGATACTATTGACCCCTTCCC   |           | b3         |
| wc1964 | CTGTAGGCAACATGATGGGGA    |           | b3         |
| wc1965 | CTGGAGCTGGAGTACCGAGGA    |           | b3         |
| wc1966 | GAGGAGAGCTTGCTAAGTAGTAG  |           | b3         |
| wc1967 | AGGTACAGCCACTGCAAGGA     |           | b3         |
| wc2087 | AGAAACCTCGTCTTCCTCGCTCCT | <i>bW</i> | b3         |
| wc2088 | GAAGGGAGTGGGCTCTGGCATTG  |           | b3         |
| wc2089 | GGTCACTTGGCACATTCGTGGGAG |           | b3         |
| wc2174 | GCCTTCAACCACTCACCCAATATC | <i>bW</i> | b1, b2, b3 |

---

**Table S5 Predicted genes on the *MAT-1* locus**

| Gene    | Gene description                                                     |
|---------|----------------------------------------------------------------------|
| UE_1329 | DNA-binding protein C1D                                              |
| UE_1330 | Homeodomain transcription factor bE1                                 |
| UE_1331 | B mating type protein                                                |
| UE_1332 | Related to n-terminal acetyltransferase 1                            |
| UE_1333 | Uncharacterized protein                                              |
| UE_1334 | Probable casein kinase-1 hhp1                                        |
| UE_1335 | Probable RPN5-26S proteasome regulatory subunit                      |
| UE_1336 | Uncharacterized protein                                              |
| UE_1337 | Uncharacterized protein                                              |
| UE_1338 | Related to MRPL33-mitochondrial ribosomal protein, large subunit     |
| UE_1339 | Blue copper oxidase cueO                                             |
| UE_1340 | Uncharacterized protein                                              |
| UE_1341 | Uncharacterized protein                                              |
| UE_1342 | Uncharacterized protein                                              |
| UE_1343 | Related to cell cycle arrest protein BUB2                            |
| UE_1344 | Glycogen synthase kinase                                             |
| UE_1345 | hypothetical protein                                                 |
| UE_1346 | Cysteine proteinase                                                  |
| UE_1347 | Oxysterol-binding protein                                            |
| UE_1348 | Dihydrolipoyl dehydrogenase                                          |
| UE_1349 | Related to OXA1-cytochrome oxidase biogenesis protein, mitochondrial |
| UE_1350 | Uncharacterized protein                                              |
| UE_1351 | Retrovirus-related Pol polyprotein from transposon TNT 1-94          |
| UE_1352 | hypothetical protein                                                 |
| UE_1353 | Uncharacterized protein                                              |
| UE_1354 | Related to neutral amino acid permease                               |
| UE_1355 | Putative uncharacterized protein                                     |
| UE_1356 | Uncharacterized protein                                              |
| UE_1357 | Uncharacterized protein                                              |
| UE_1358 | Uncharacterized protein                                              |
| UE_1359 | AINc14C654G12340 protein                                             |
| UE_1360 | Uncharacterized protein                                              |
| UE_1361 | AINc14C654G12337 protein                                             |
| UE_1362 | DNA polymerase                                                       |
| UE_1363 | Uncharacterized protein                                              |
| UE_1364 | hypothetical protein                                                 |
| UE_1365 | Putative gag-pol polyprotein                                         |
| UE_1366 | Adenylosuccinate lyase                                               |
| UE_1367 | Uncharacterized protein                                              |
| UE_1368 | Superoxide dismutase                                                 |
| UE_1369 | Uncharacterized protein                                              |

|         |                                                            |
|---------|------------------------------------------------------------|
| UE_1370 | Putative uncharacterized protein                           |
| UE_1371 | Uncharacterized protein                                    |
| UE_1372 | hypothetical protein                                       |
| UE_1373 | Related to HRP1-subunit of cleavage factor I               |
| UE_1374 | hypothetical protein                                       |
| UE_1375 | Uncharacterized protein                                    |
| UE_1376 | Related to PEX6-peroxisomal assembly protein               |
| UE_1377 | AP complex subunit beta                                    |
| UE_1378 | rRNA adenine N                                             |
| UE_1379 | rRNA adenine N                                             |
| UE_1380 | Serine/threonine-protein phosphatase                       |
| UE_1381 | DNA-directed RNA polymerase subunit beta                   |
| UE_1382 | hypothetical protein                                       |
| UE_1383 | Uncharacterized protein                                    |
| UE_1384 | Putative uncharacterized protein                           |
| UE_1385 | Uncharacterized protein                                    |
| UE_1386 | Related to centromere binding factor 1                     |
| UE_1387 | Eukaryotic translation initiation factor 5A-2              |
| UE_1388 | C6 transcription factor                                    |
| UE_1389 | hypothetical protein                                       |
| UE_1390 | tRNA-dihydrouridine synthase                               |
| UE_1391 | Histone chaperone ASF1                                     |
| UE_1392 | Related to retrotransposon nucleocapsid protein            |
| UE_1393 | Putative uncharacterized protein                           |
| UE_1394 | Chromosome 6, whole genome shotgun sequence                |
| UE_1395 | Related to CDC24-GTP/GDP exchange factor for Cdc42p        |
| UE_1396 | Uncharacterized protein                                    |
| UE_1397 | Putative 26S proteasome regulatory subunit Rpn10           |
| UE_1398 | Probable CCR4-NOT transcription complex, subunit 7         |
| UE_1399 | Probable ubiquitin-conjugating enzyme E2                   |
| UE_1400 | hypothetical protein                                       |
| UE_1401 | Uncharacterized protein                                    |
| UE_1402 | Related to translation elongation factor eEF1, gamma chain |
| UE_1403 | Related to mitochondrial intermediate peptidase            |
| UE_1404 | Phospholipid-transporting ATPase                           |
| UE_1405 | Uncharacterized protein                                    |
| UE_1406 | Uncharacterized protein                                    |
| UE_1407 | Zinc finger protein 622-like protein                       |
| UE_1408 | 60S ribosomal protein L40                                  |
| UE_1409 | Related to Gag-pol polyprotein                             |
| UE_1410 | Uncharacterized protein                                    |
| UE_1411 | Uncharacterized protein                                    |
| UE_1412 | Related to glutamyl-tRNA synthetase                        |

|         |                                                       |
|---------|-------------------------------------------------------|
| UE_1413 | Chromosome 5, whole genome shotgun sequence           |
| UE_1414 | Retrotransposon protein, putative, Ty1-copia subclass |
| UE_1415 | Uncharacterized protein                               |
| UE_1416 | Uncharacterized protein                               |
| UE_1417 | Uncharacterized protein                               |
| UE_1418 | Uncharacterized protein                               |
| UE_1419 | Uncharacterized protein                               |
| UE_1420 | hypothetical protein                                  |
| UE_1421 | Uncharacterized protein                               |
| UE_1422 | hypothetical protein                                  |
| UE_1423 | Probable glyoxaloxidase 1                             |
| UE_1424 | Probable 60S ribosomal protein L12                    |
| UE_1425 | WD40 repeat-like protein                              |
| UE_1426 | Related to thymidylate synthase                       |
| UE_1427 | Related to Protein transport protein Sec24C           |
| UE_1428 | Peroxidase                                            |
| UE_1429 | Multifunctional tryptophan biosynthesis protein       |
| UE_1430 | Probable karyopherin beta-1 subunit                   |
| UE_1431 | Uncharacterized protein                               |
| UE_1432 | Uncharacterized protein                               |
| UE_1433 | Uncharacterized protein                               |
| UE_1434 | hypothetical protein                                  |
| UE_1435 | Likely protein kinase                                 |
| UE_1436 | Related to Gag-pol polyprotein                        |
| UE_1437 | Related to retrotransposon nucleocapsid protein       |
| UE_1438 | hypothetical protein                                  |
| UE_1439 | Uncharacterized protein                               |
| UE_1440 | Uncharacterized protein                               |
| UE_1441 | Left border a protein                                 |
| UE_1442 | A2-pheromone receptor Pra1                            |
| UE_1443 | Pantothenate synthetase                               |

---
